# Supplementary material for: 7-Chloroquinolinehydrazones as First-in-Class Anticancer Experimental Drugs in the NCI-60 Screen among Different Investigated Series of Aryl, Quinoline, Pyridine, Benzothiazole and Imidazolehydrazones
Source: MDPI journal article supplement (doi:10.3390/ph16050691), 2023-05-03
Supplement: s1 [file s1]

**7-Chloroquinolinehydrazones as First-in-Class Anticancer  
Experimental Drugs in the NCI-60 Screen among Different  
Investigated Series of Aryl, Quinoline, Pyridine, Benzothiazole and Imidazolehydrazones**

**Georgiana Negru (Apostol) <sup>1</sup>, Alina Ghinet <sup>1,2,3,\*</sup> and Elena Bîcu <sup>1,\*</sup>**

1 Faculty of Chemistry, 'Alexandru Ioan Cuza' University of Iasi, Bd. Carol I, nr. 11, 700506 Iasi, Romania; georgiana\_16\_95@yahoo.com

2 Junia, Health and Environment, Laboratory of Sustainable Chemistry and Health, F-59000 Lille, France

3 Institut National de la Santé et de la Recherche Médicale, Centre Hospitalier Universitaire de Lille, Institut Pasteur Lille, U1167—RID-AGE—Facteurs de Risque et Déterminants Moléculaires des Maladies Liées au Vieillissement, University of Lille, F-59000 Lille, France

\* Correspondence: alina.ghinet@junia.com (A.G.); elena@uaic.ro (E.B.)

**-Supplementary material-**

1-(3-Bromophenyl)-2-(3,4,5-trimethoxybenzylidene)hydrazine (**1**).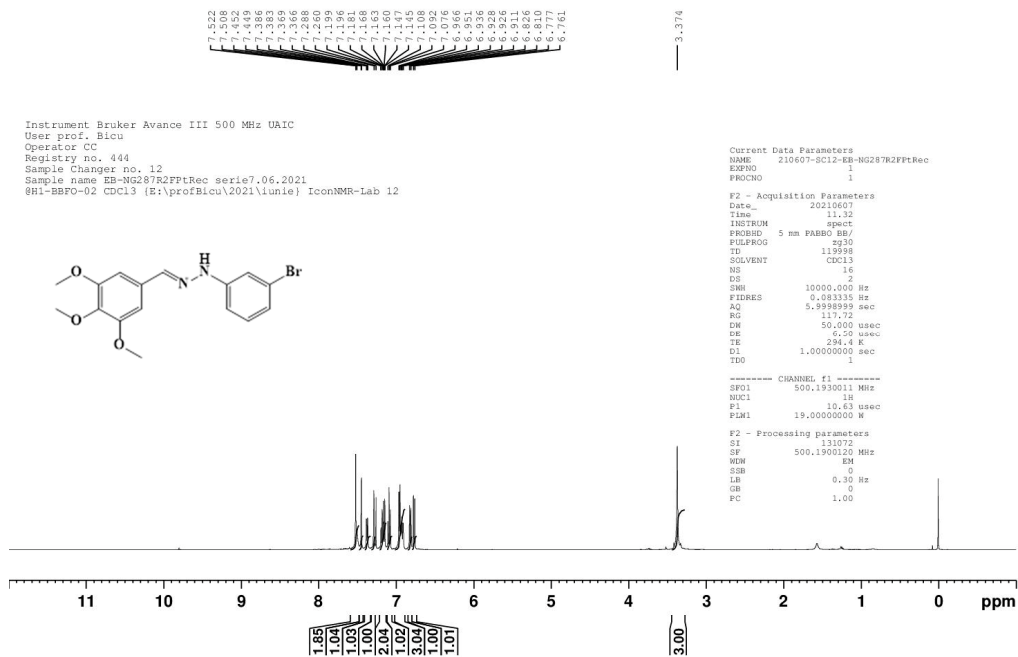

(a)

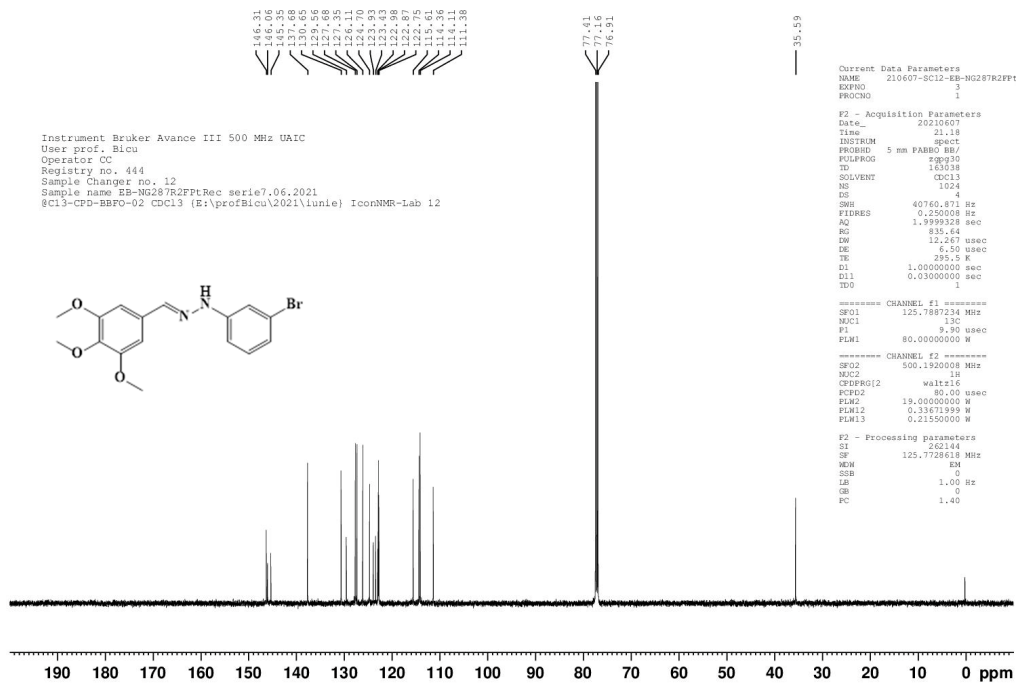

(b)

Figure S1. (a)  $^1\text{H}$ -NMR and (b)  $^{13}\text{C}$ -NMR spectra for hydrazone **1**

# 1-(3,4-dimethylphenyl)-2-(4-nitrobenzylidene)hydrazine (2).

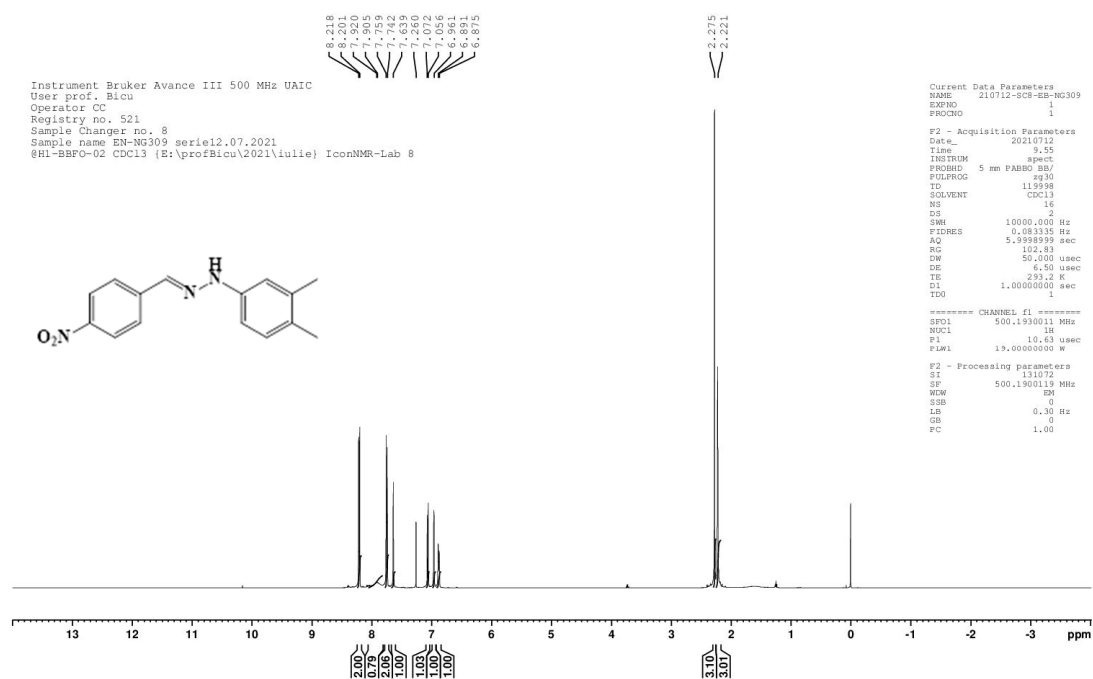

(a)

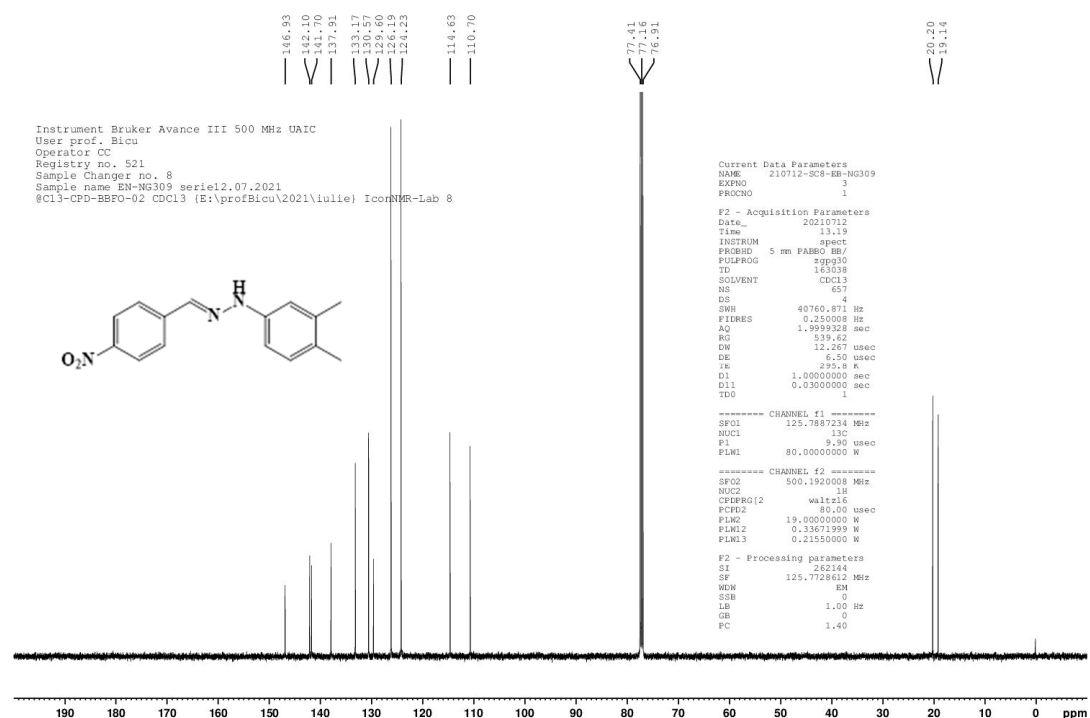

(b)

Figure S2. (a) <sup>1</sup>H-NMR and (b) <sup>13</sup>C-NMR spectra for hydrazone 2

2-(2-(4-nitrobenzylidene)hydrazinyl)-4,5-dihydro-1*H*-imidazole (**3**)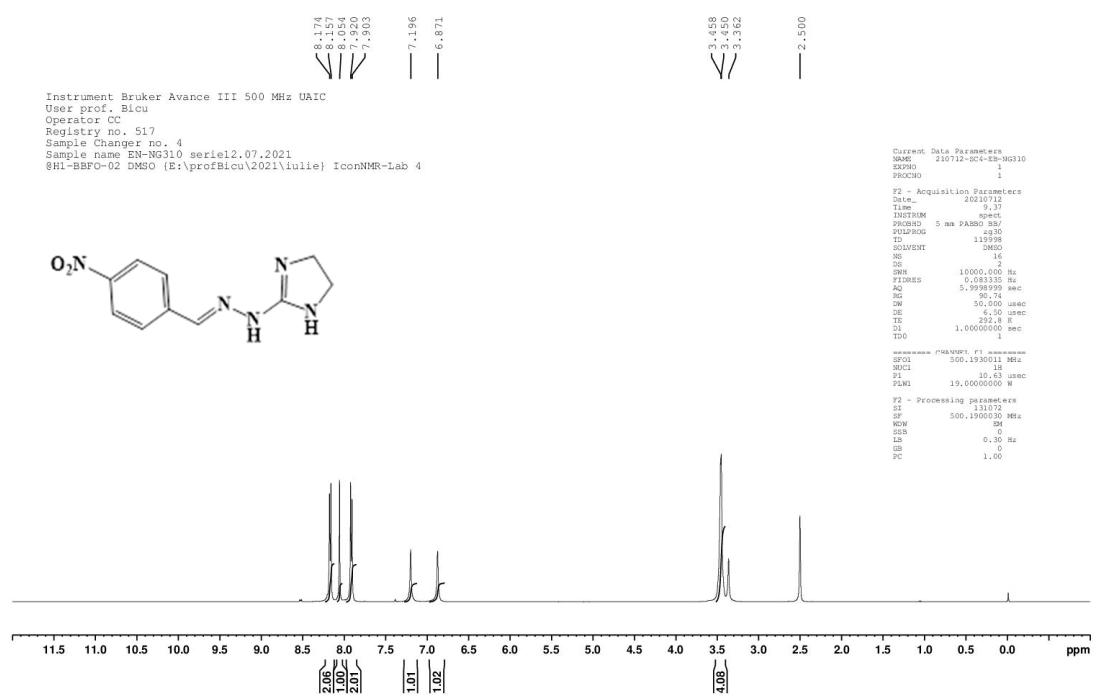

(a)

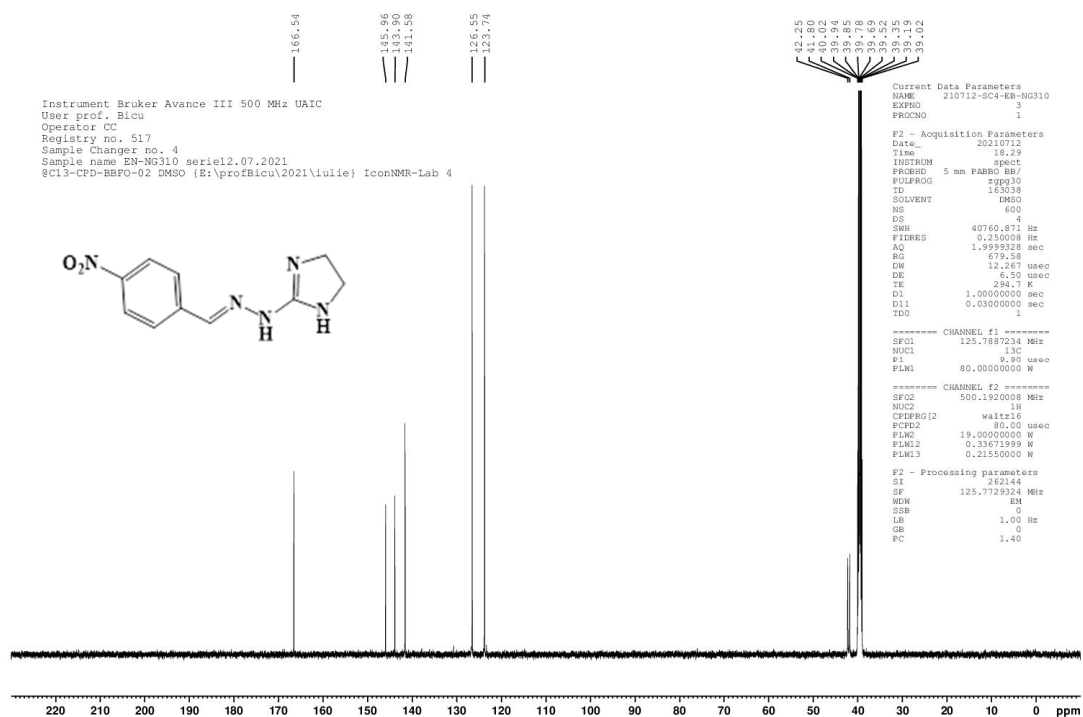

(b)

Figure S3. (a)  $^1\text{H}$ -NMR and (b)  $^{13}\text{C}$ -NMR spectra for hydrazone **3**

2-(2-(thiophen-2-ylmethylene)hydrazinyl)-4,5-dihydro-1H-imidazole (4).

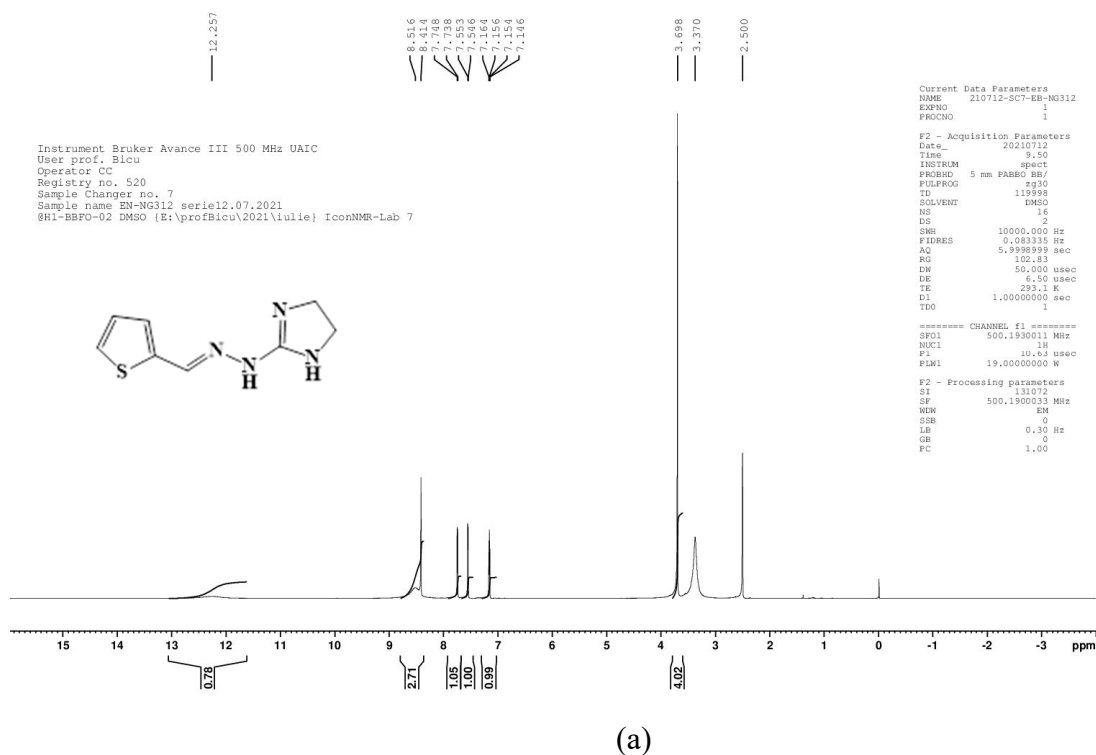

(a)

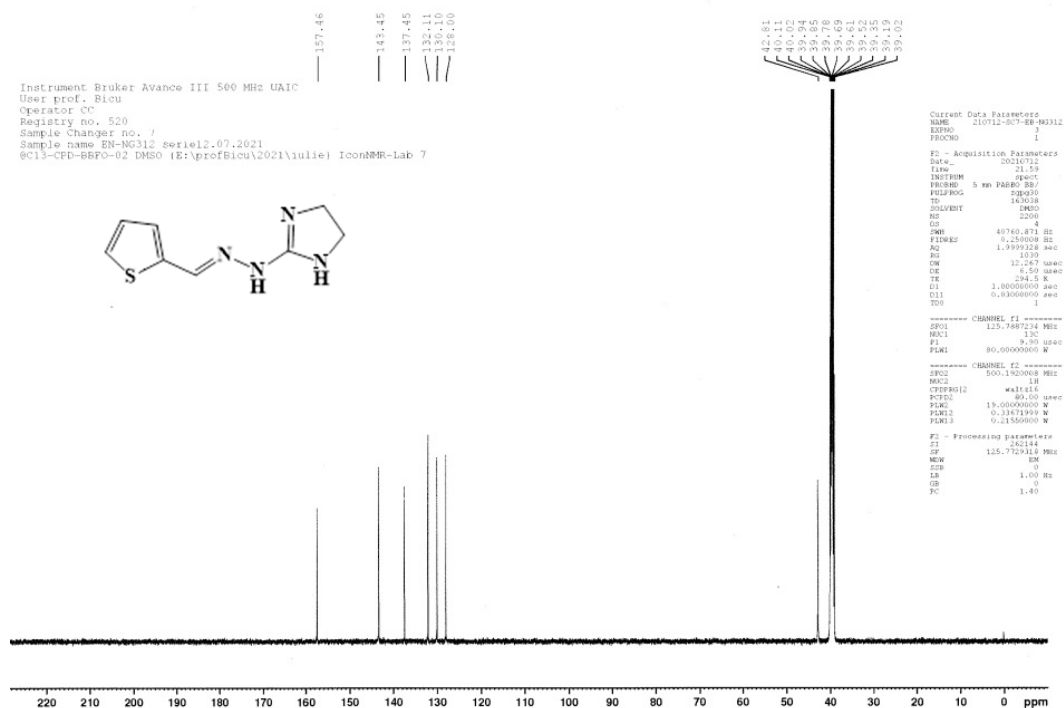

(b)

Figure S4. (a) <sup>1</sup>H-NMR and (b) <sup>13</sup>C-NMR spectra for hydrazone 4

2-(2-(2,4-dichlorobenzylidene)hydrazinyl)-4,5-dihydro-1H-imidazole (5).

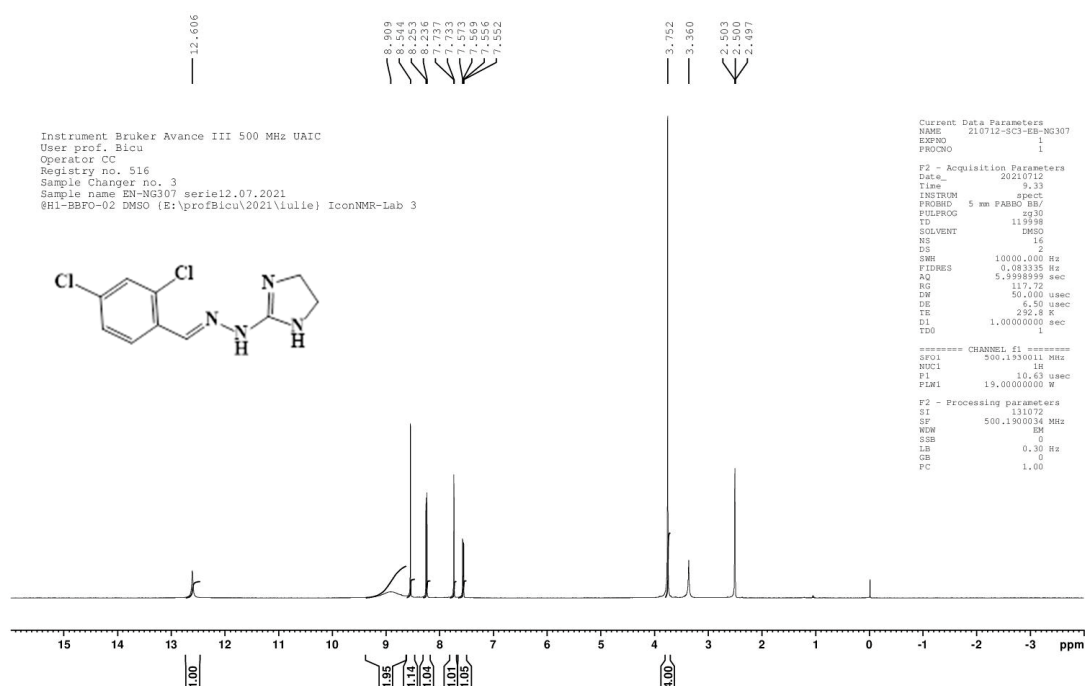

(a)

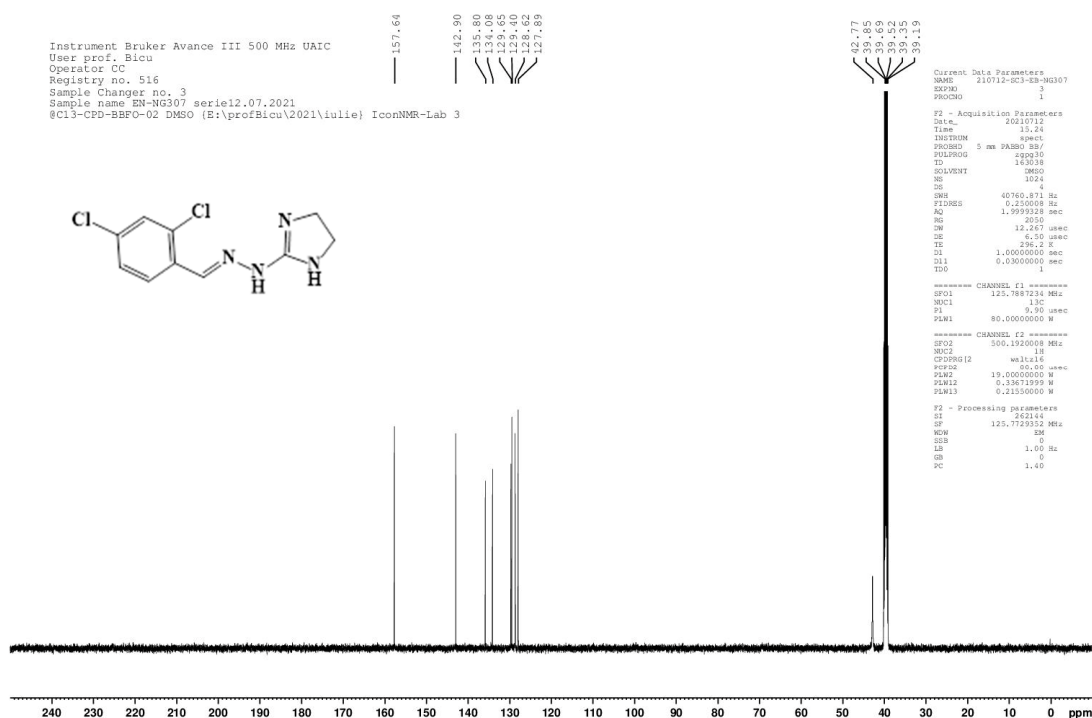

7-chloro-4-(2-(3-chloro-4-methoxybenzylidene)hydrazinyl)quinoline (6).

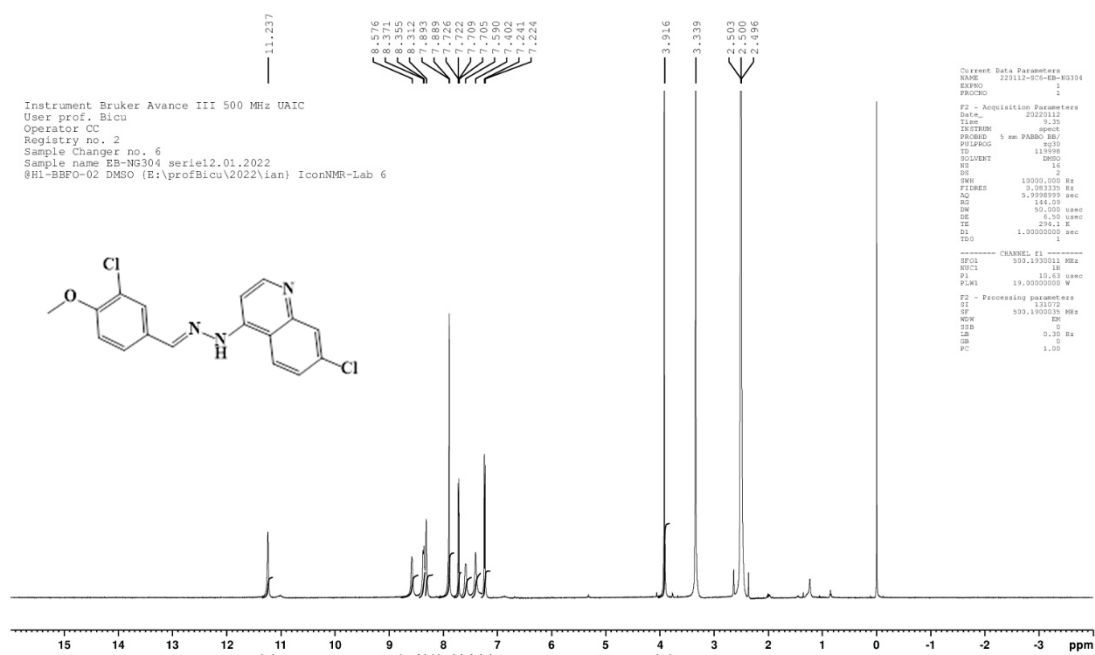

(a)

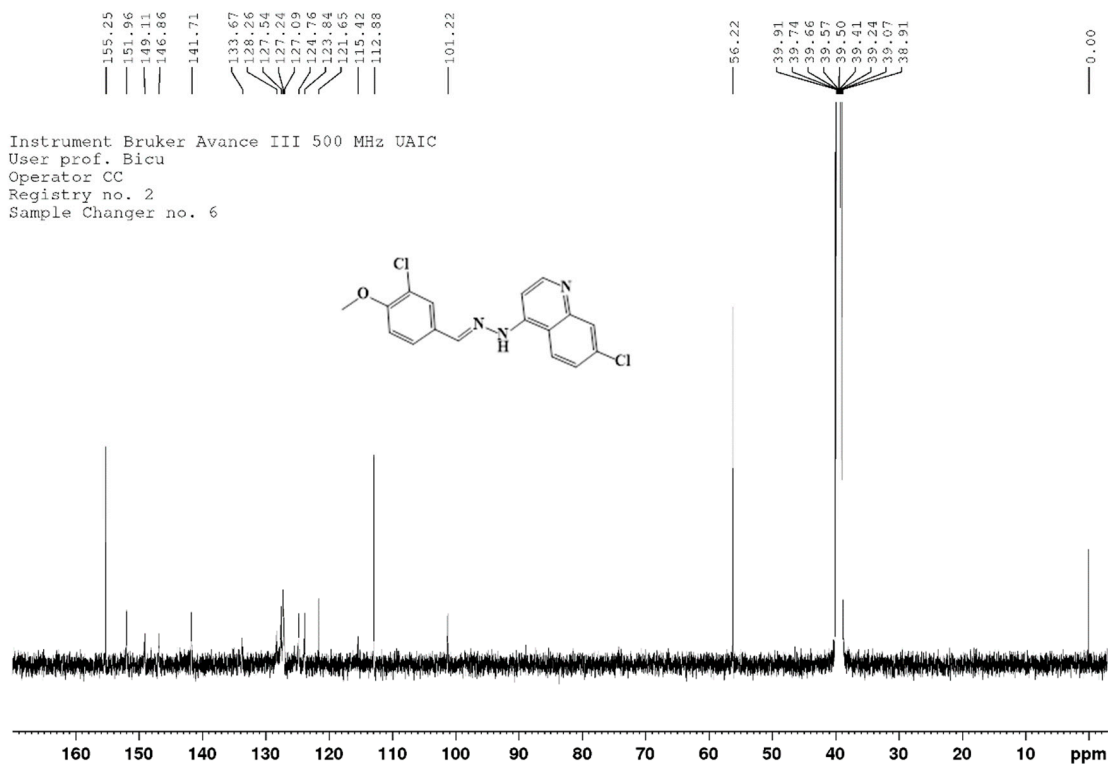

(b)

Figure S6. (a)  $^1\text{H}$ -NMR and (b)  $^{13}\text{C}$ -NMR spectra for hydrazone 6

4-((2-(7-chloroquinolin-4-yl)hydrazono)methyl)-2,6-dimethoxyphenol (7).

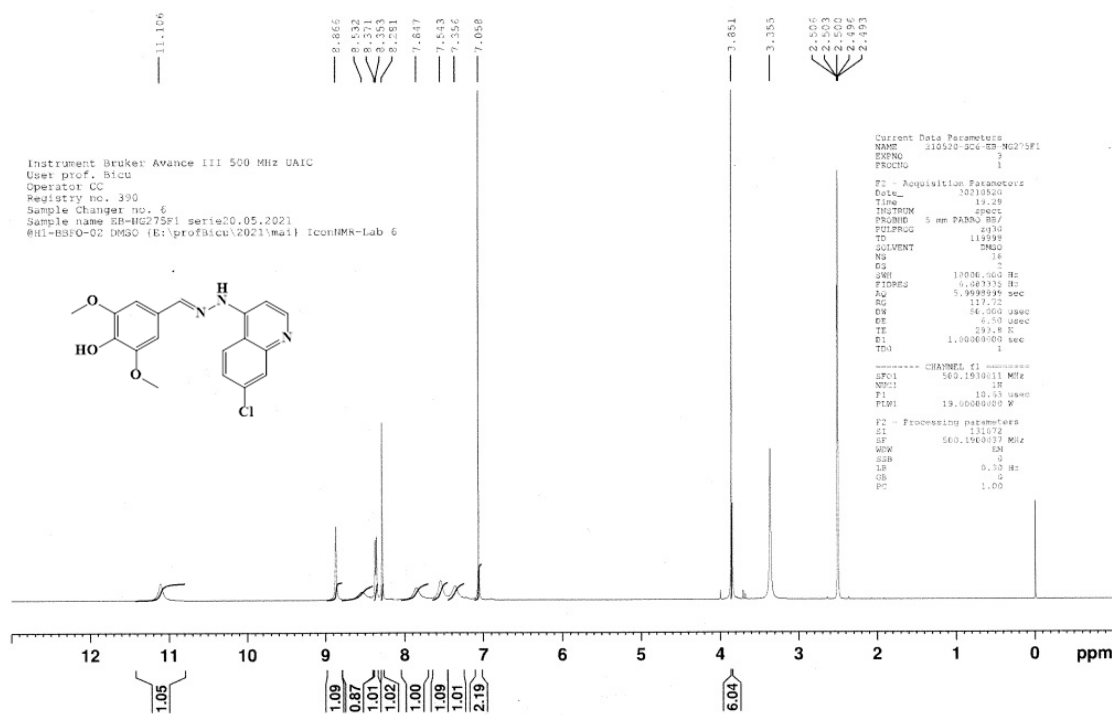

(a)

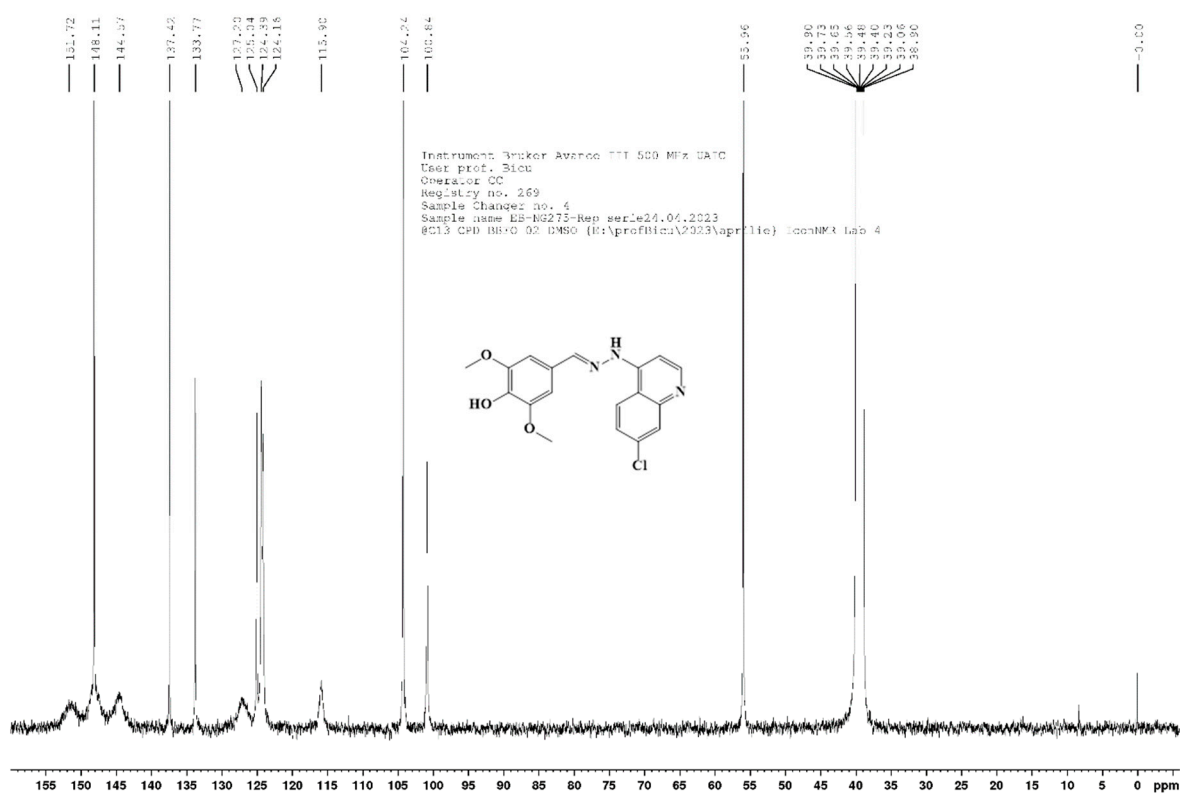

(b)

Figure S7. (a) <sup>1</sup>H-NMR and (b) <sup>13</sup>C-NMR spectra for hydrazone 7



3-((2-(7-chloroquinolin-4-yl)hydrazono)methyl)-10-methyl-10H-phenothiazine (8).

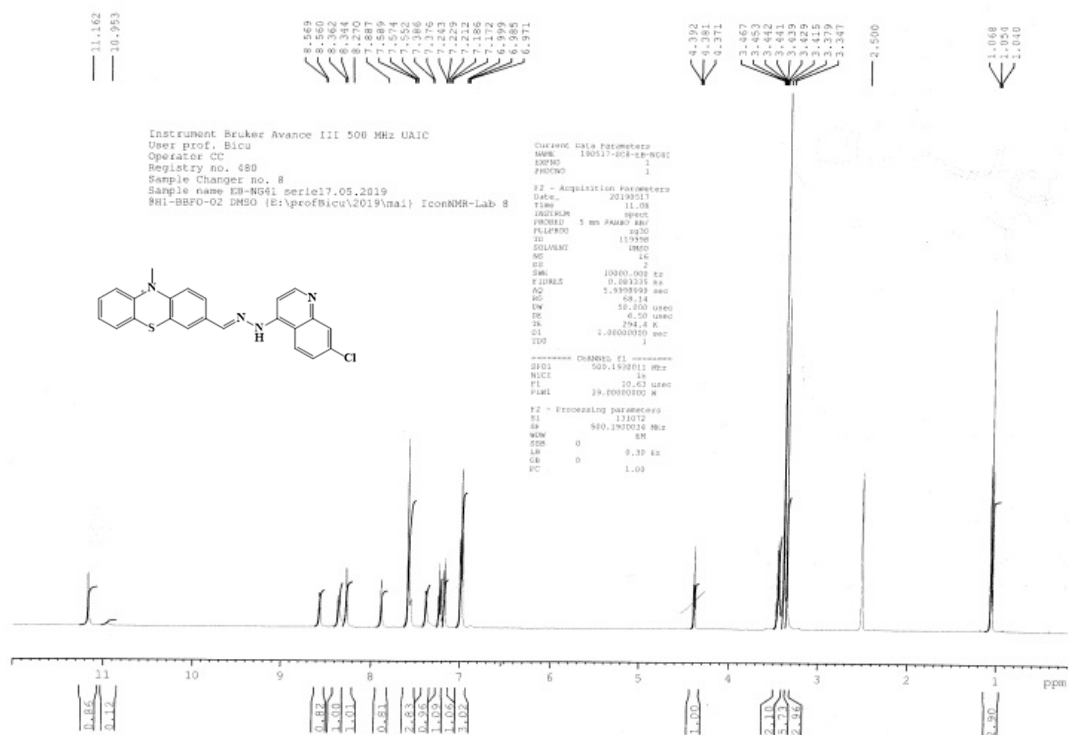

(a)

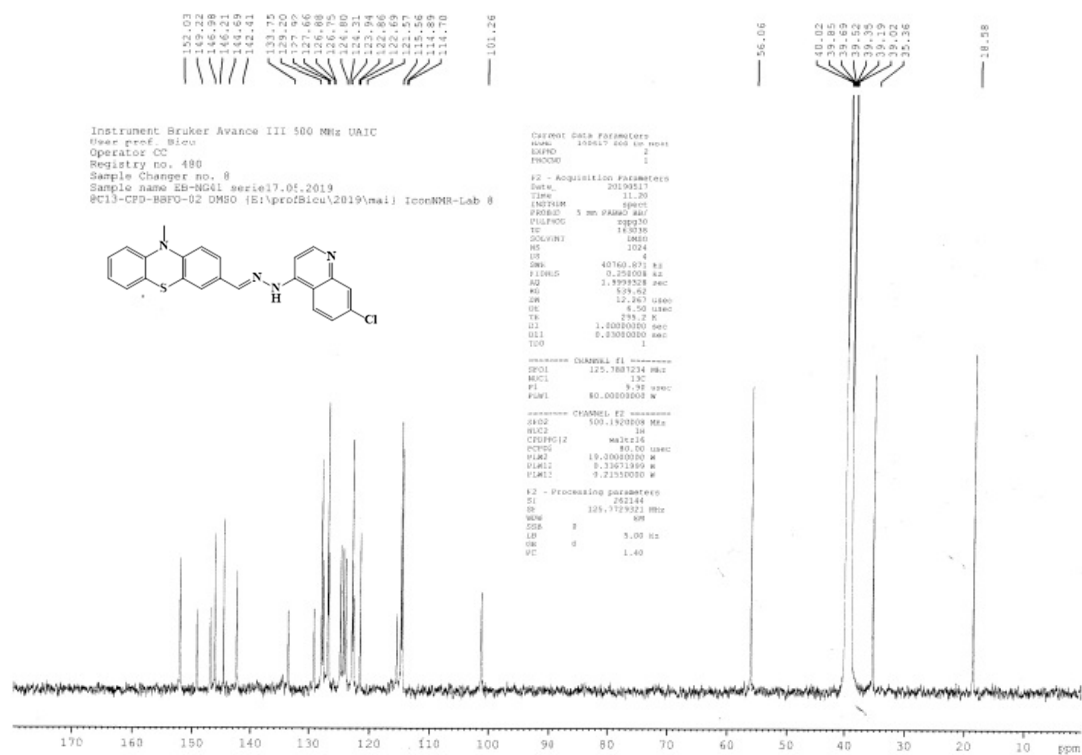

(b)

Figure S8. (a) <sup>1</sup>H-NMR and (b) <sup>13</sup>C-NMR spectra for hydrazone 8

3-((2-(4-methoxyphenyl)hydrazono)methyl)-10-methyl-10*H*-phenothiazine (**9**).

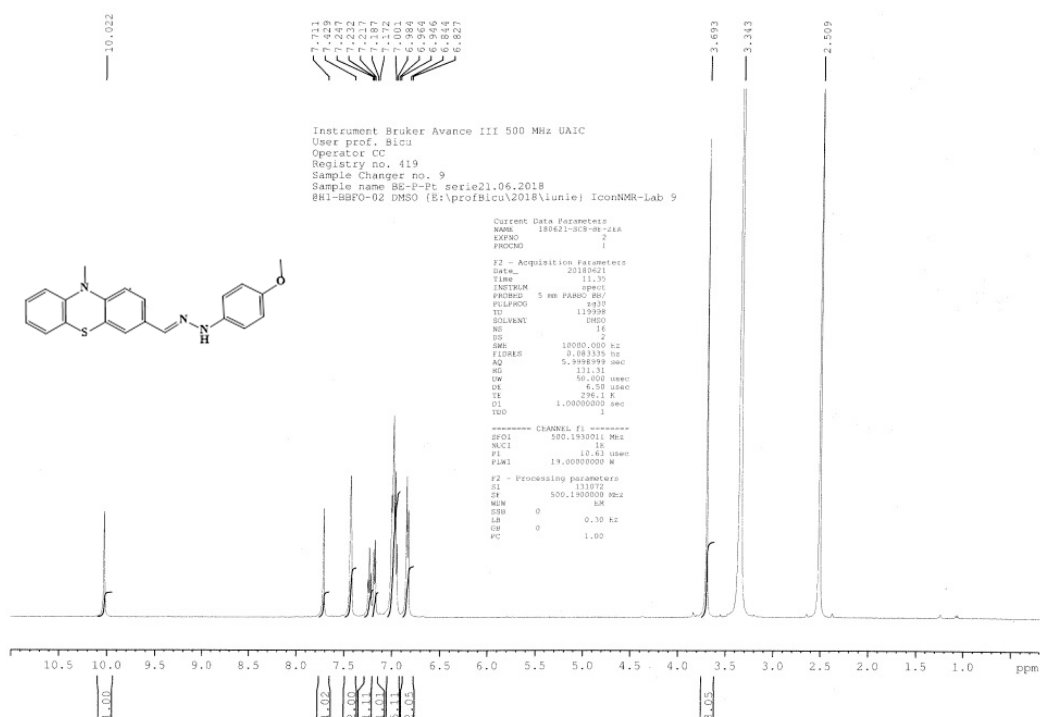

(a)

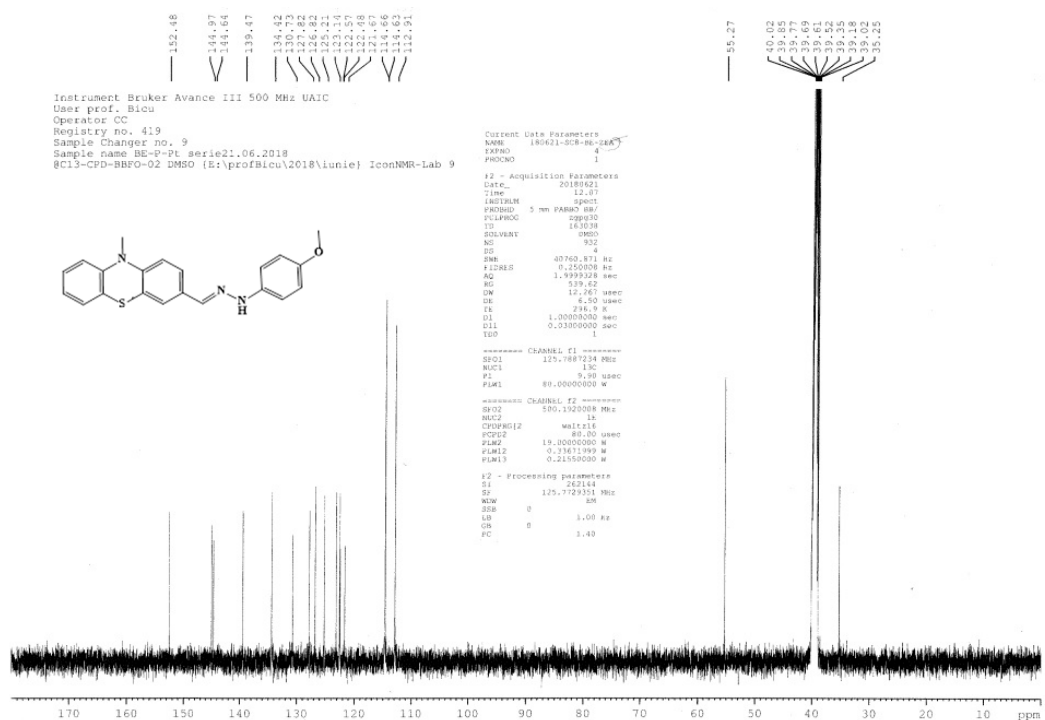

(b)

Figure S9. (a) <sup>1</sup>H-NMR and (b) <sup>13</sup>C-NMR spectra for hydrazone **9**

3-((2-(benzo[*d*]thiazol-2-yl)hydrazono)methyl)-10-methyl-10*H*-phenothiazine (**10**).

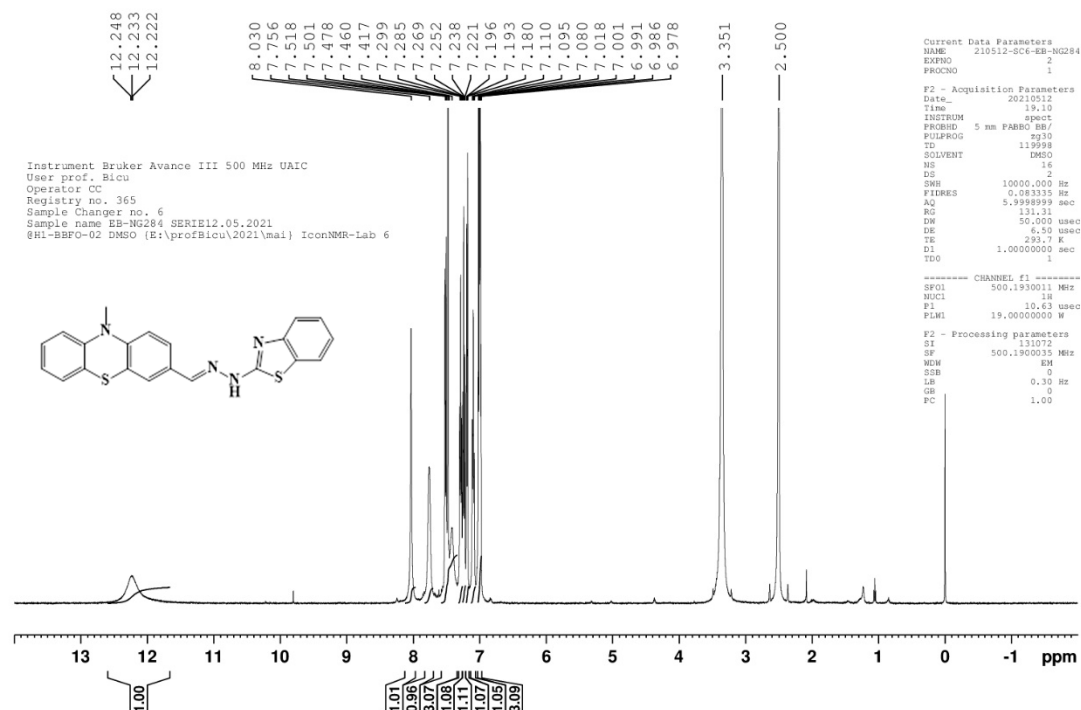

(a)

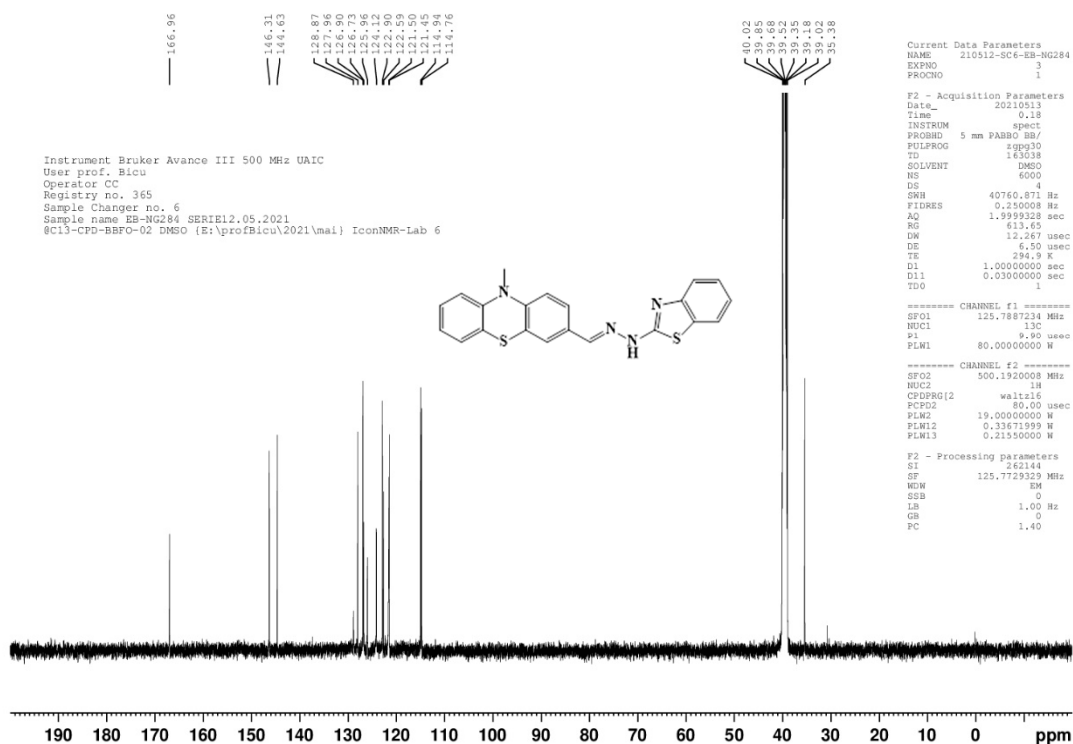

(b)

Figure S10. (a) <sup>1</sup>H-NMR and (b) <sup>13</sup>C-NMR spectra for hydrazone **10**

3-((2-(4-bromophenyl)hydrazono)methyl)-10-methyl-10*H*-phenothiazine (**11**).

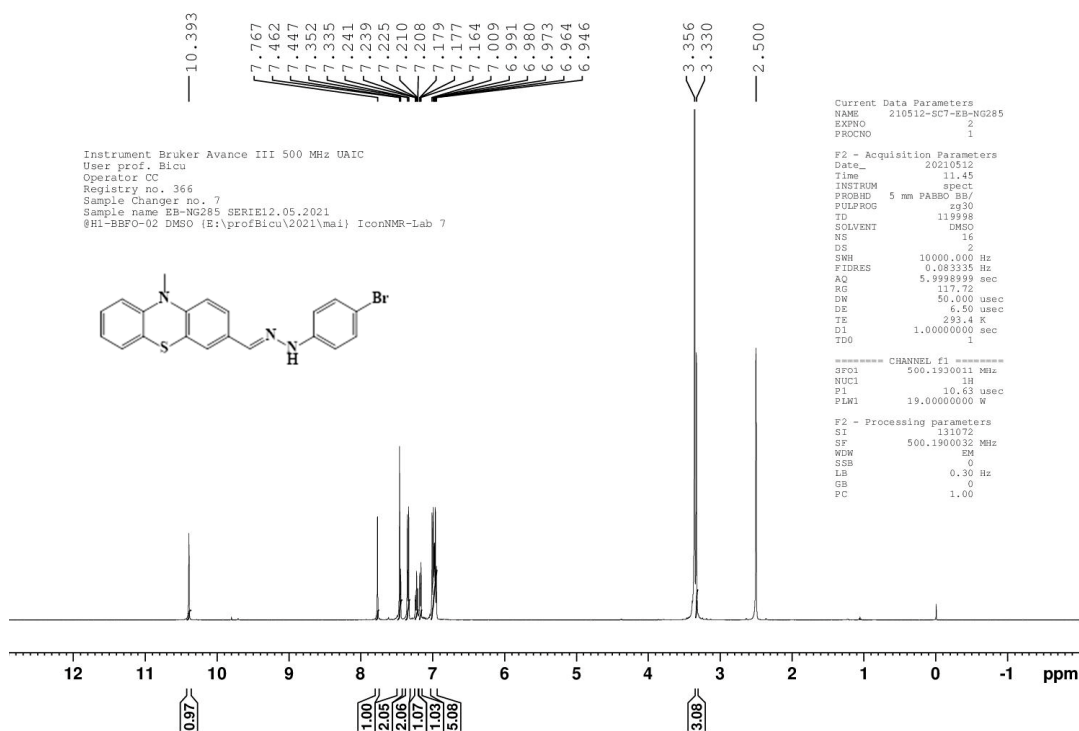

(a)

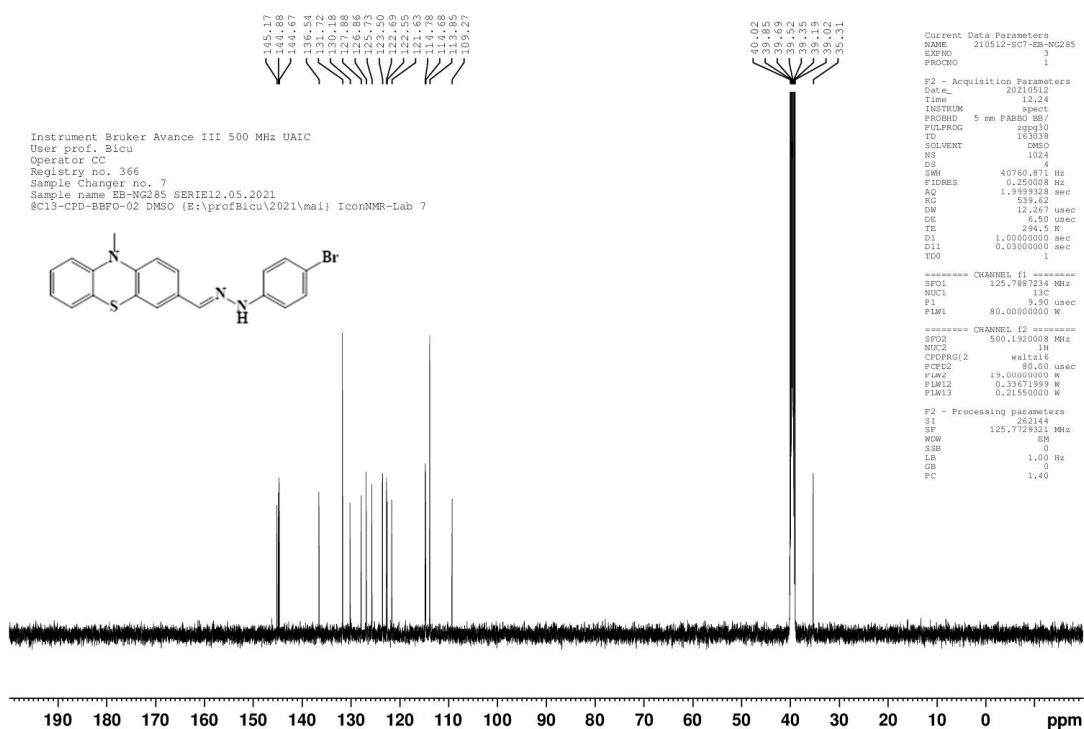

(b)

Figure S11. (a) <sup>1</sup>H-NMR and (b) <sup>13</sup>C-NMR spectra for hydrazone **11**

3-((2-(3-bromophenyl)hydrazono)methyl)-10-methyl-10H-phenothiazine (12).

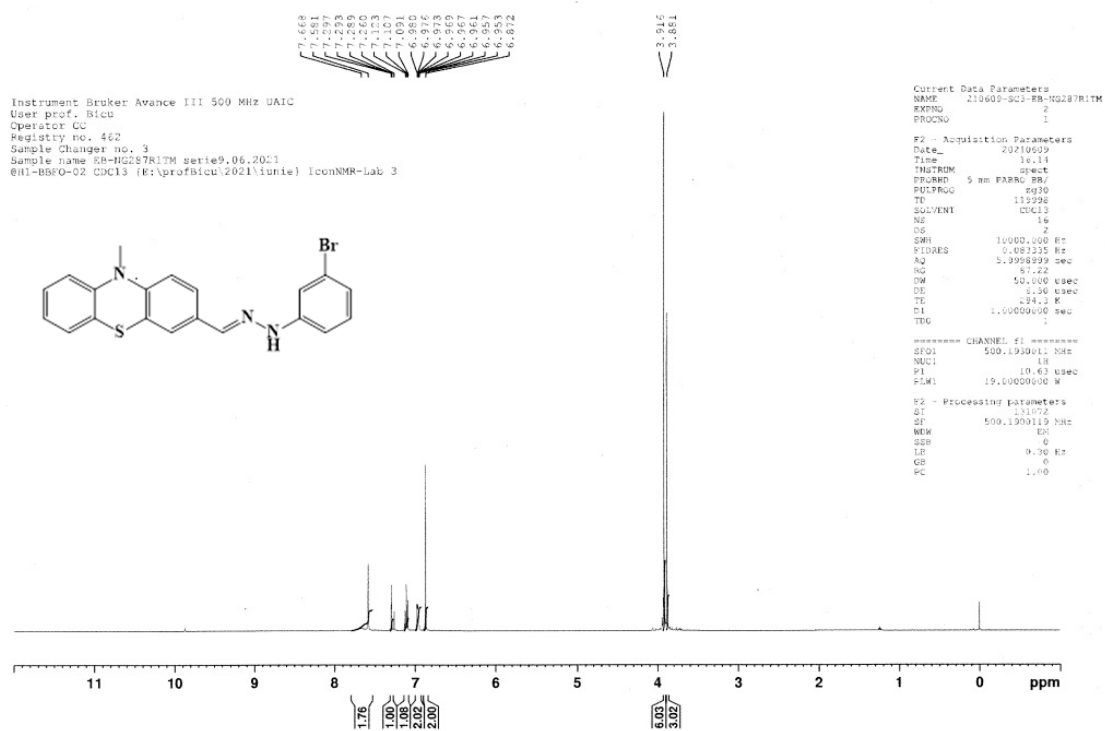

(a)

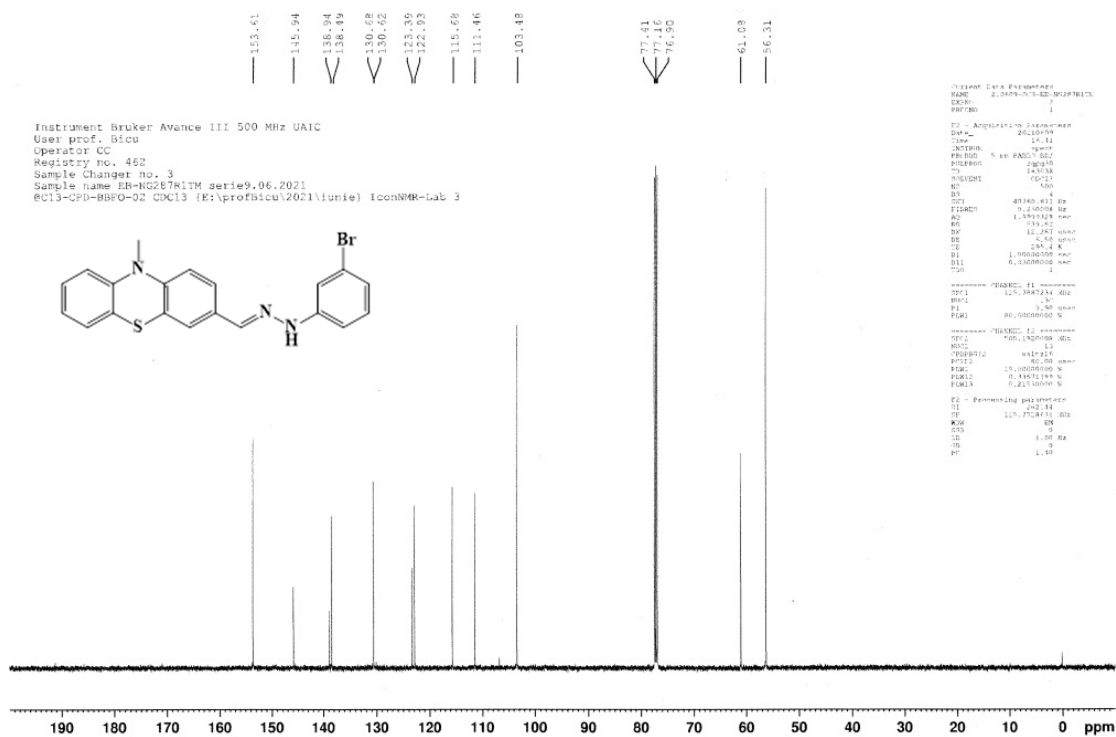

(b)

Figure S12. (a) <sup>1</sup>H-NMR and (b) <sup>13</sup>C-NMR spectra for hydrazone 12

4-(2-((1*H*-indol-3-yl)methylene)hydrazinyl)-7-chloroquinoline (13).

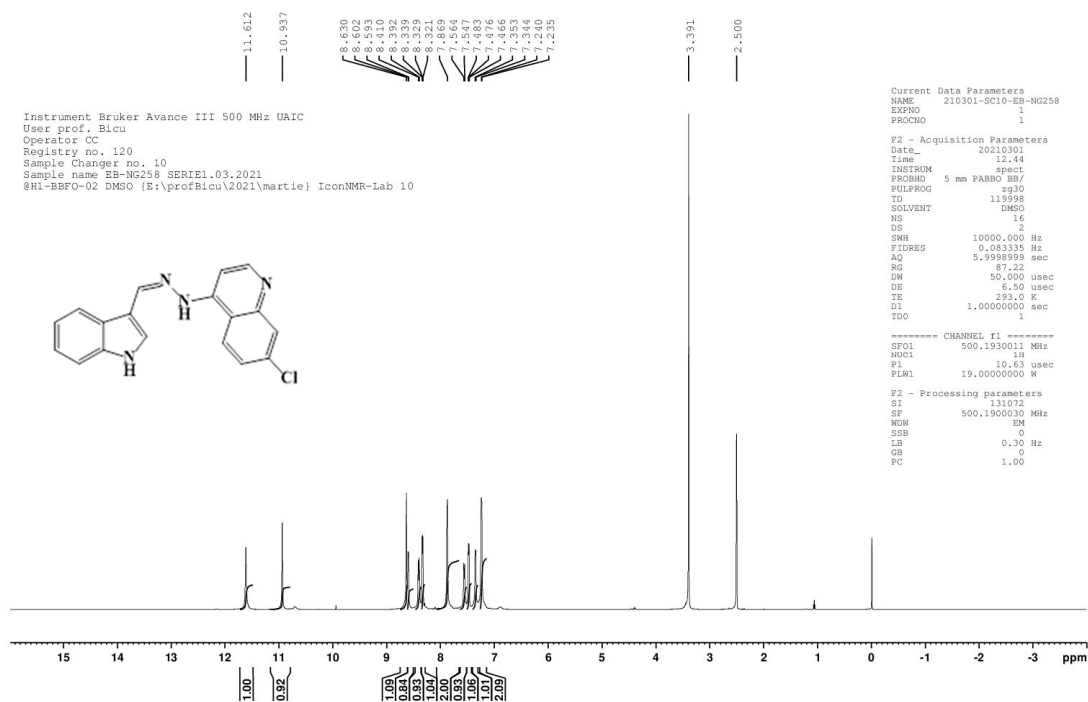

(a)

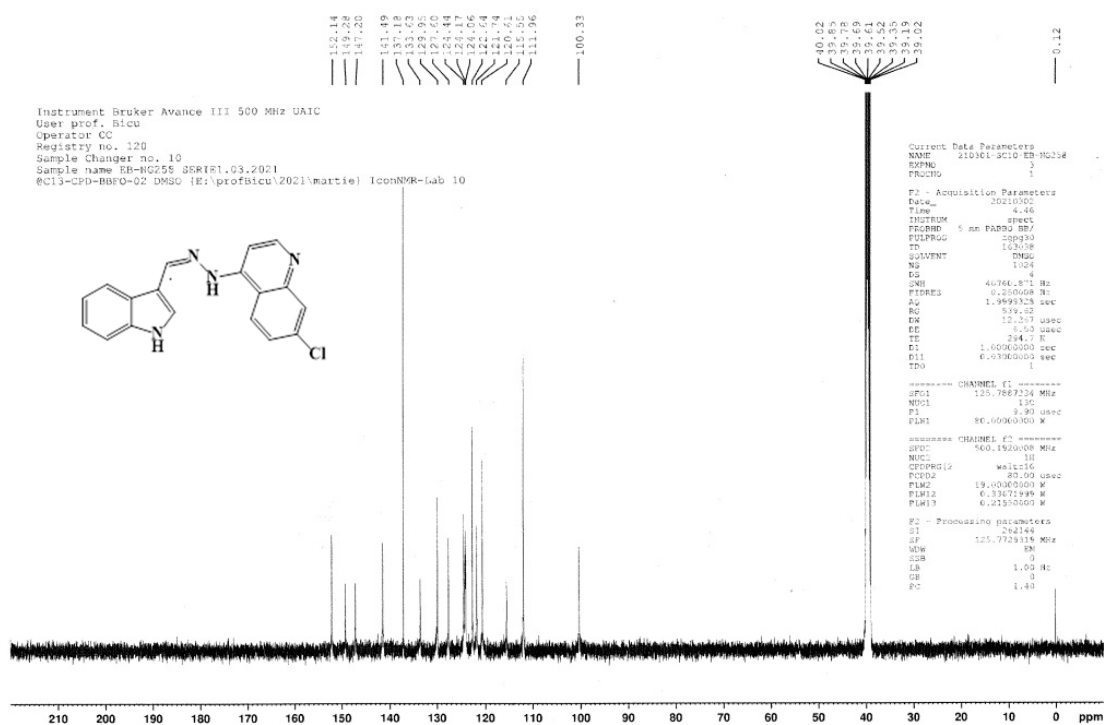

(b)

Figure S13. (a)  $^1\text{H}$ -NMR and (b)  $^{13}\text{C}$ -NMR spectra for hydrazone **13**

3-((2-(6-chloropyridin-2-yl)hydrazono)methyl)-1*H*-indole (14).

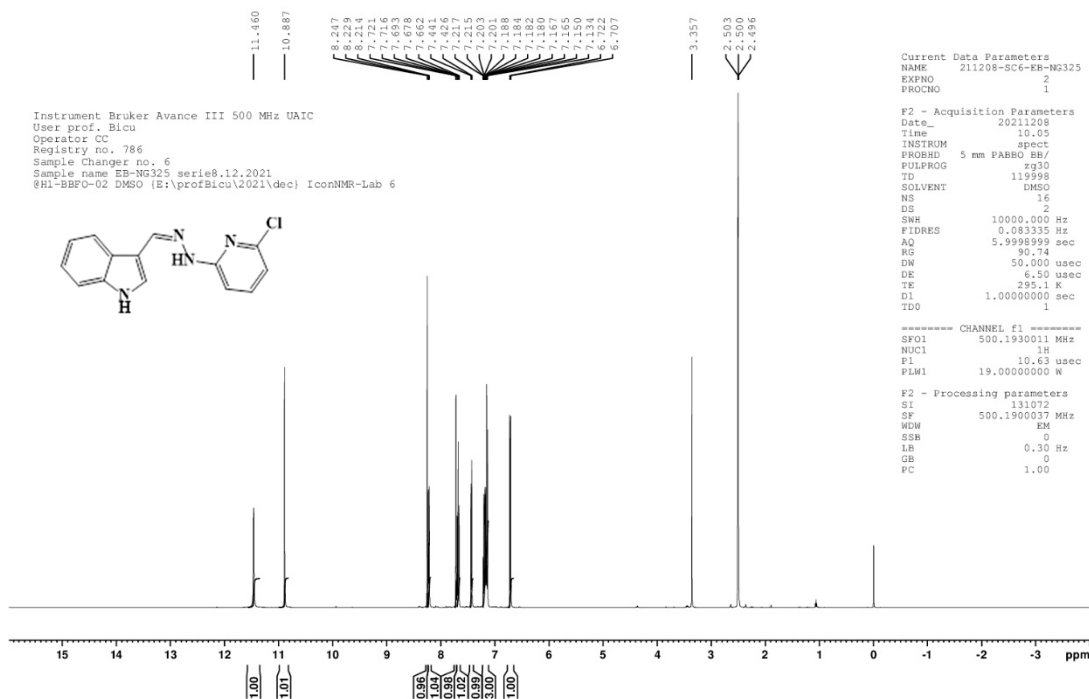

(a)

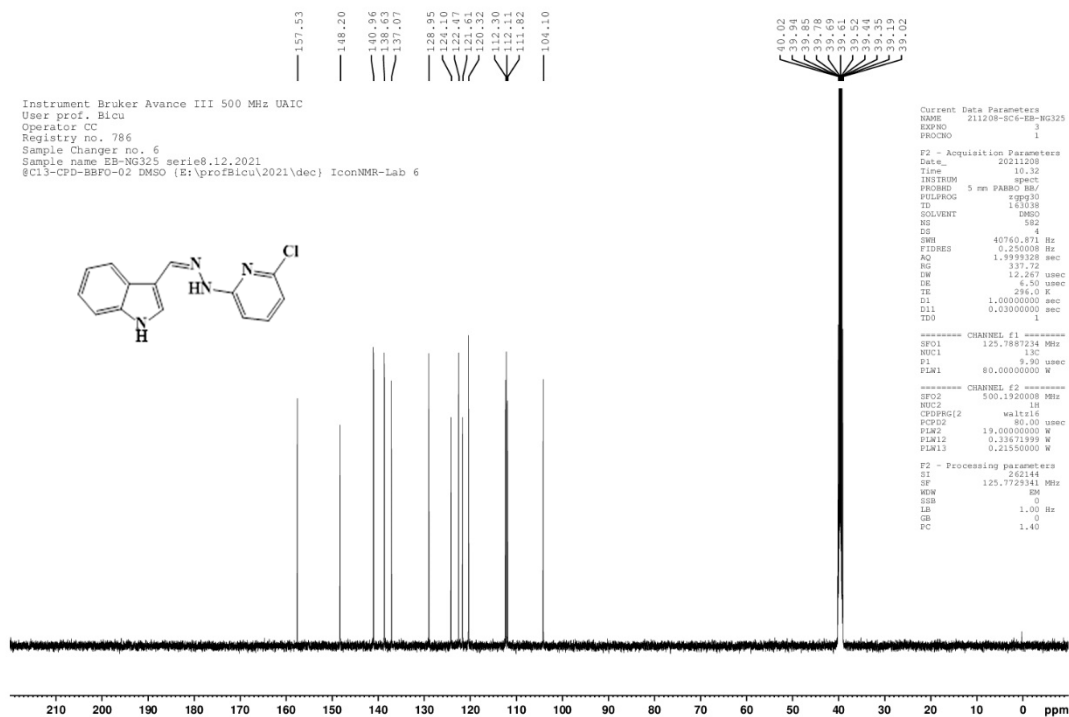

(b)

Figure S14. (a) <sup>1</sup>H-NMR and (b) <sup>13</sup>C-NMR spectra for hydrazone **14**

### 3-((2-(5-bromopyridin-2-yl)hydrazono)methyl)-1*H*-indole (15).

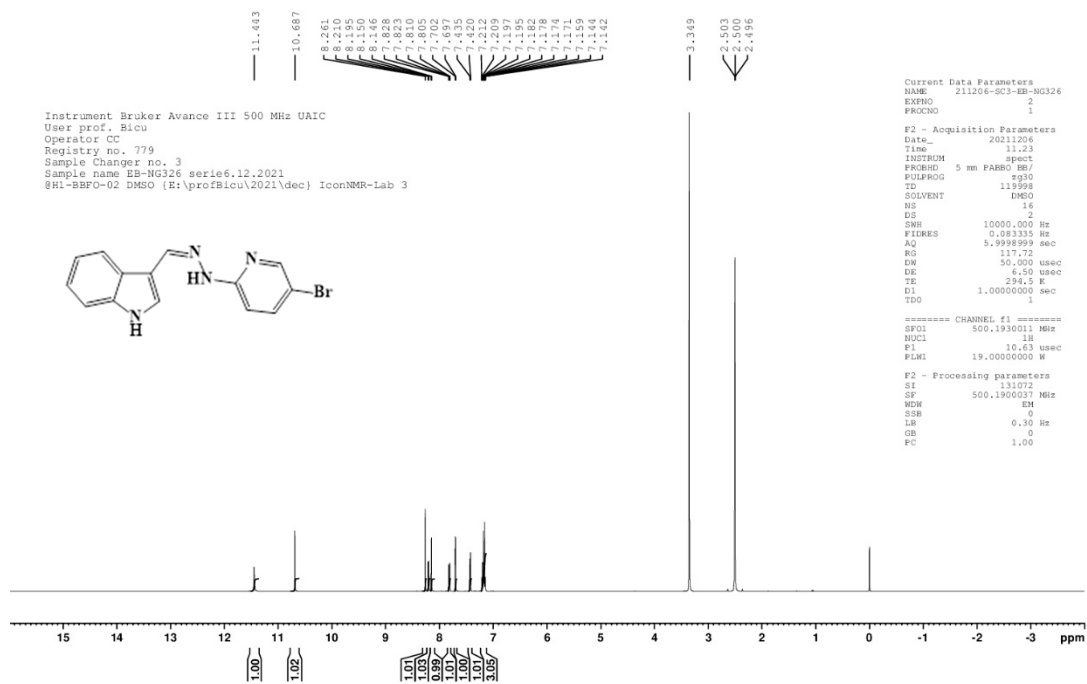

(a)

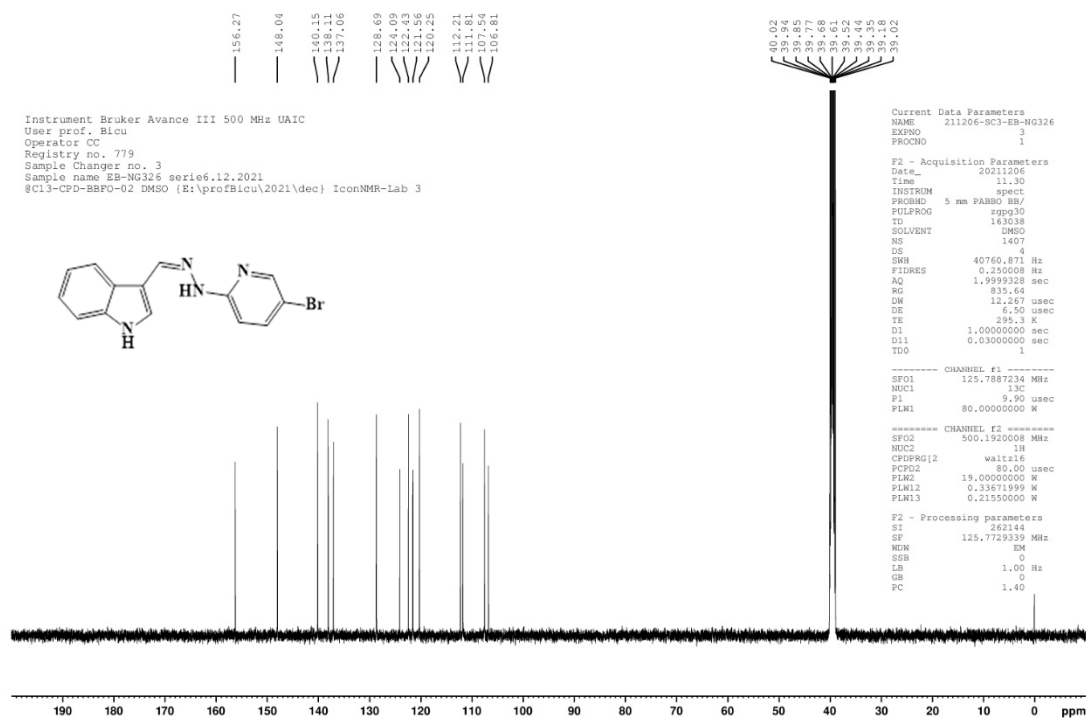

(b)

Figure S15. (a) <sup>1</sup>H-NMR and (b) <sup>13</sup>C-NMR spectra for hydrazone **15**



7-chloro-4-(2-((5-methoxy-1*H*-indol-3-yl)methylene)hydrazinyl)quinoline (16).

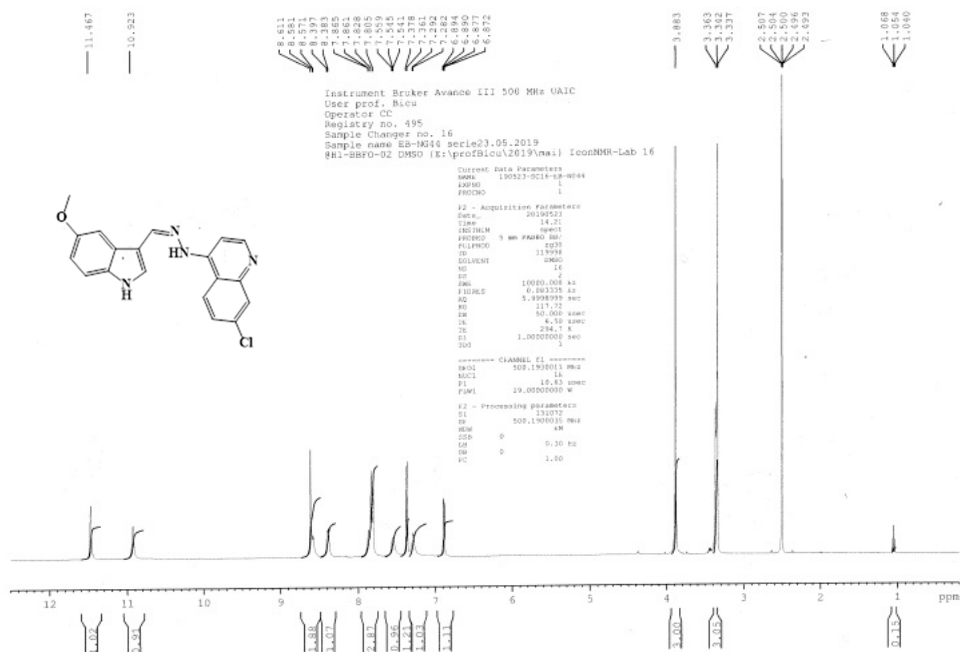

(a)

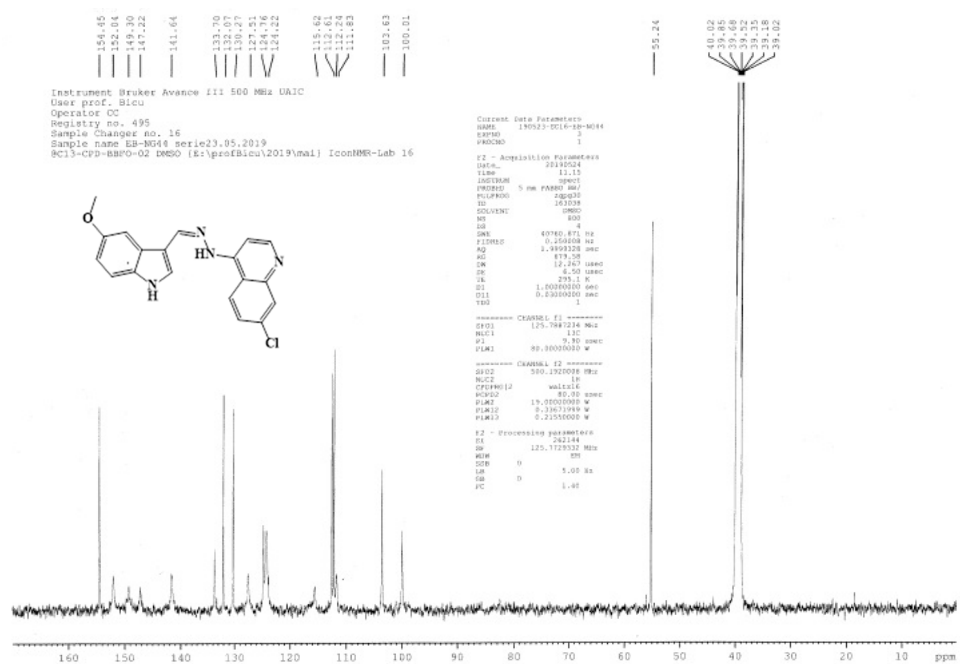

(b)

Figure S16. (a) <sup>1</sup>H-NMR and (b) <sup>13</sup>C-NMR spectra for hydrazone 16

2-(2-((5-methoxy-1*H*-indol-3-yl)methylene)hydrazinyl)benzo[*d*]thiazole (**17**).

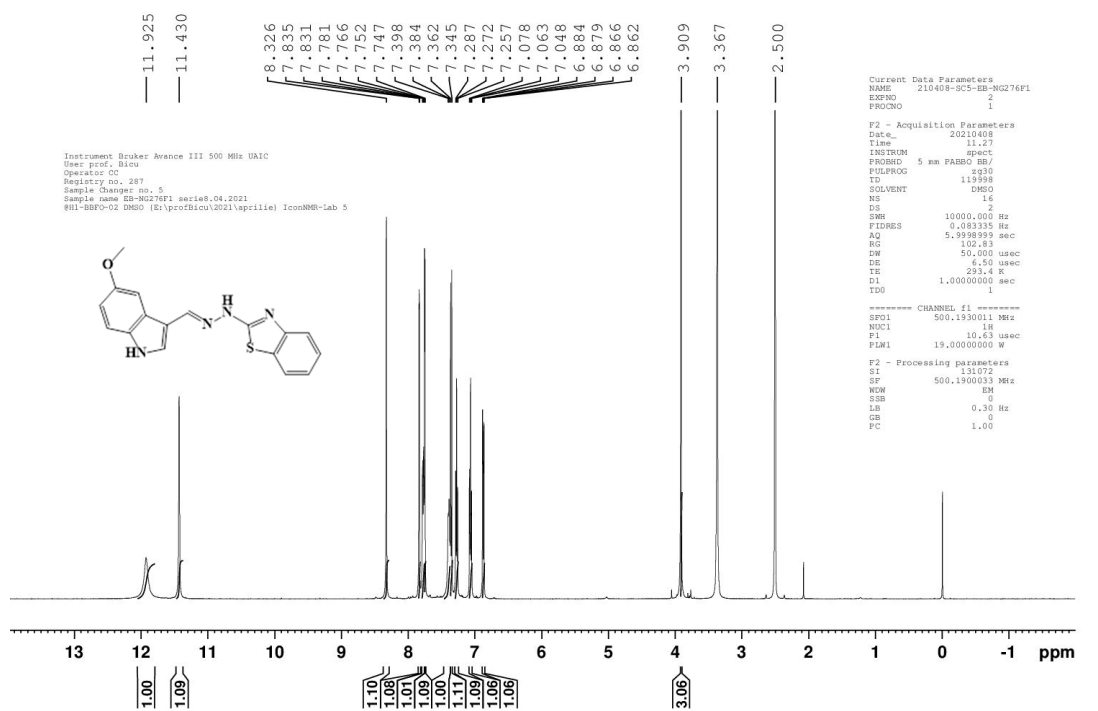

(a)

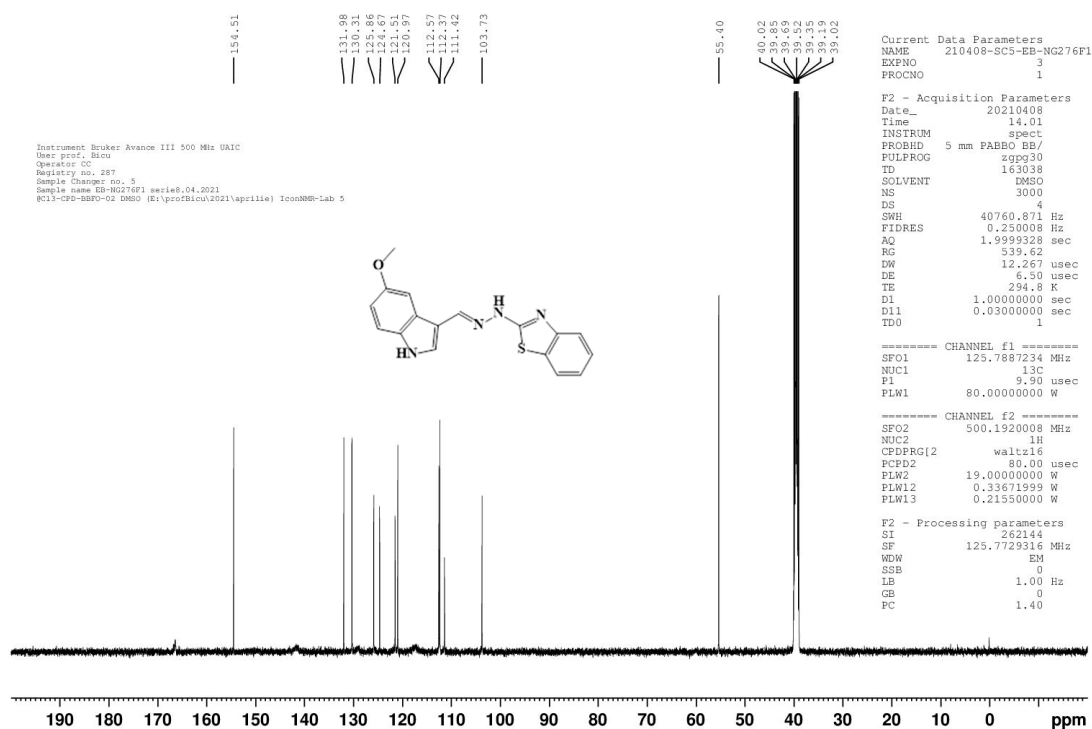

(b)

Figure S17. (a) <sup>1</sup>H-NMR and (b) <sup>13</sup>C-NMR spectra for hydrazone **17**

3-((2-(5-bromopyridin-2-yl)hydrazono)methyl)-5-methoxy-1*H*-indole (**18**).

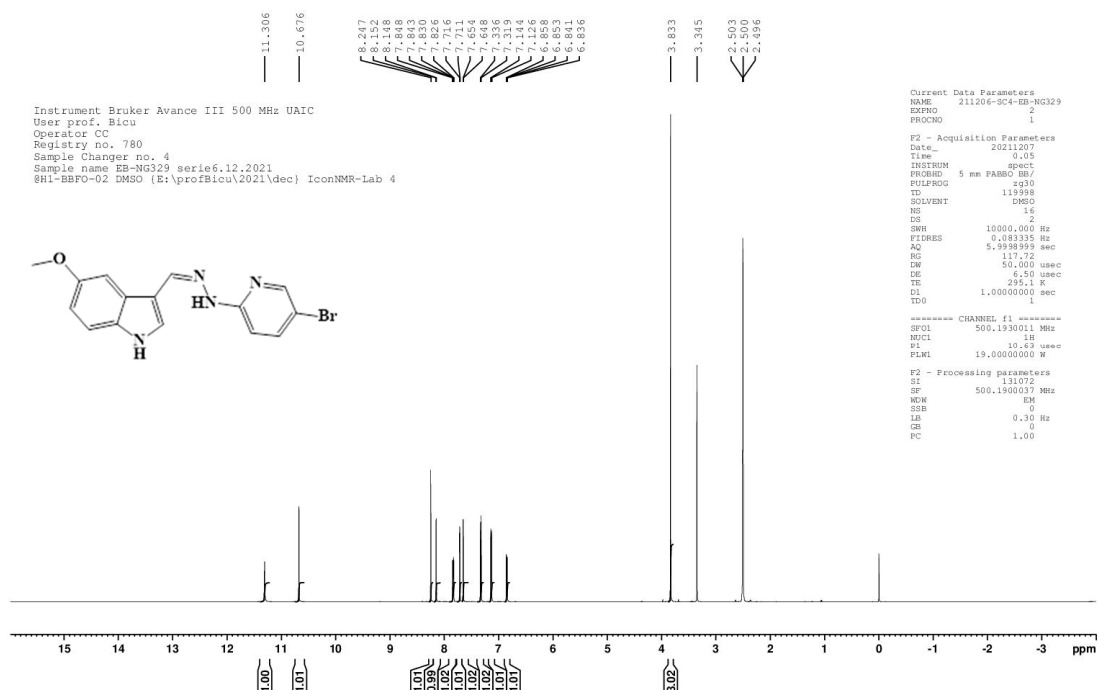

(a)

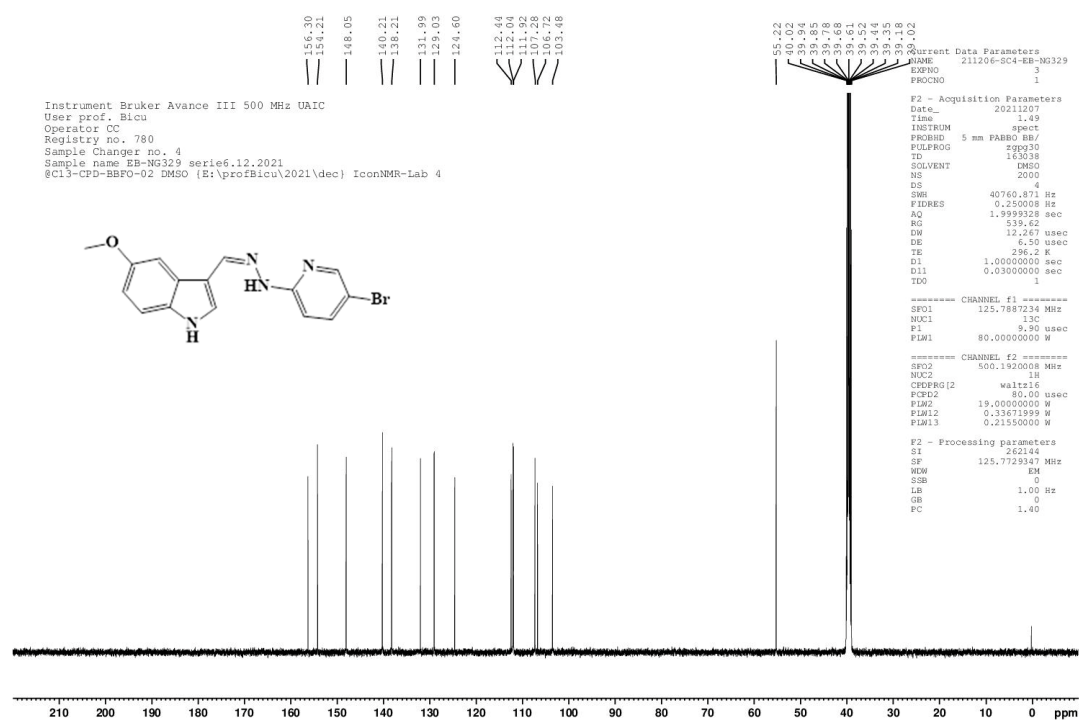

(b)

Figure S18. (a)  $^1\text{H}$ -NMR and (b)  $^{13}\text{C}$ -NMR spectra for hydrazone **18**

3-((2-(6-chloropyridin-2-yl)hydrazono)methyl)-5-methoxy-1*H*-indole (19).

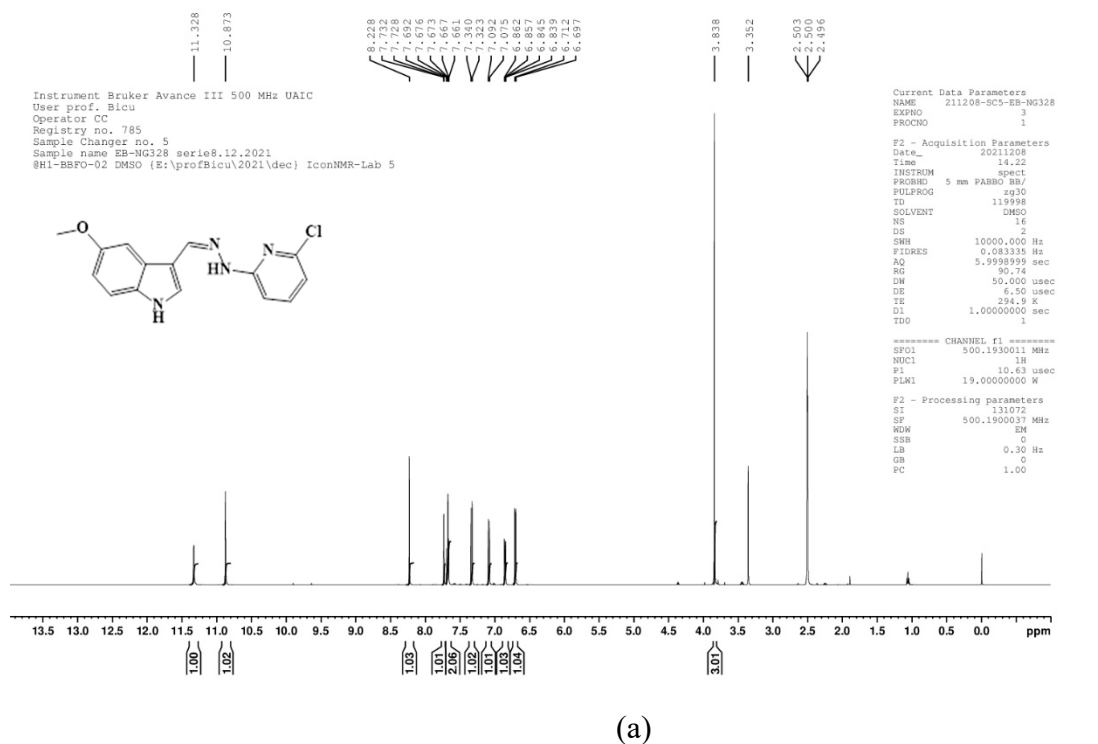

(a)

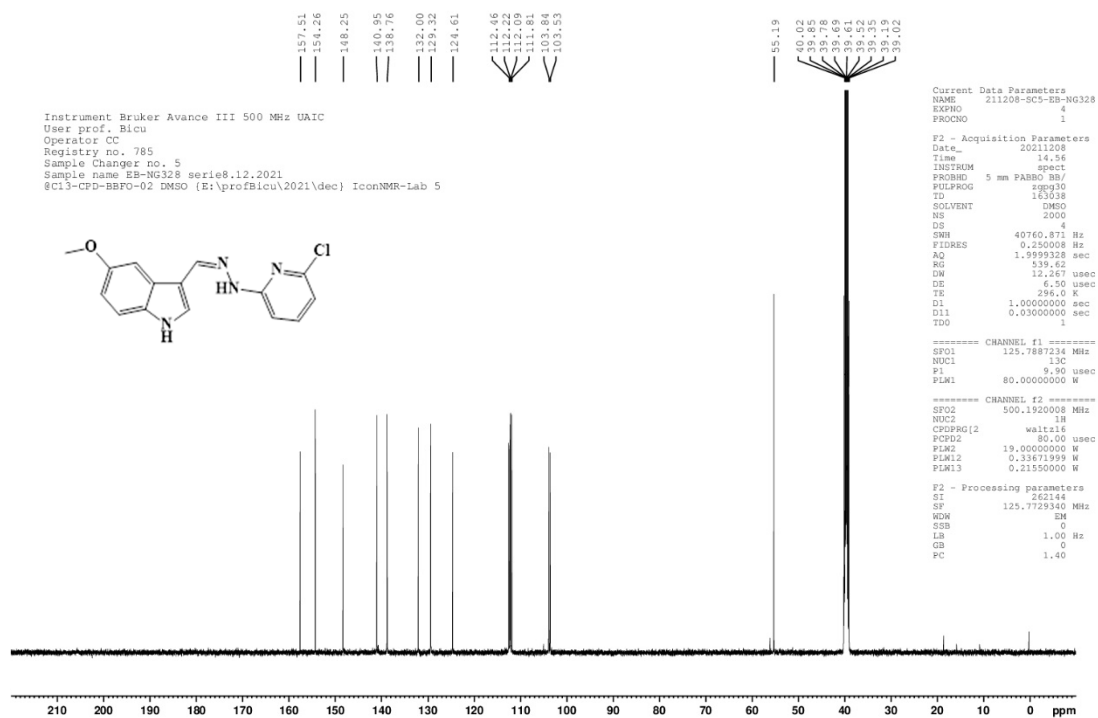

(b)

Figure S19. (a) <sup>1</sup>H-NMR and (b) <sup>13</sup>C-NMR spectra for hydrazone 19

7-chloro-4-((1-methyl-1*H*-indol-3-yl)methylene)hydrazinyl)quinoline (20).

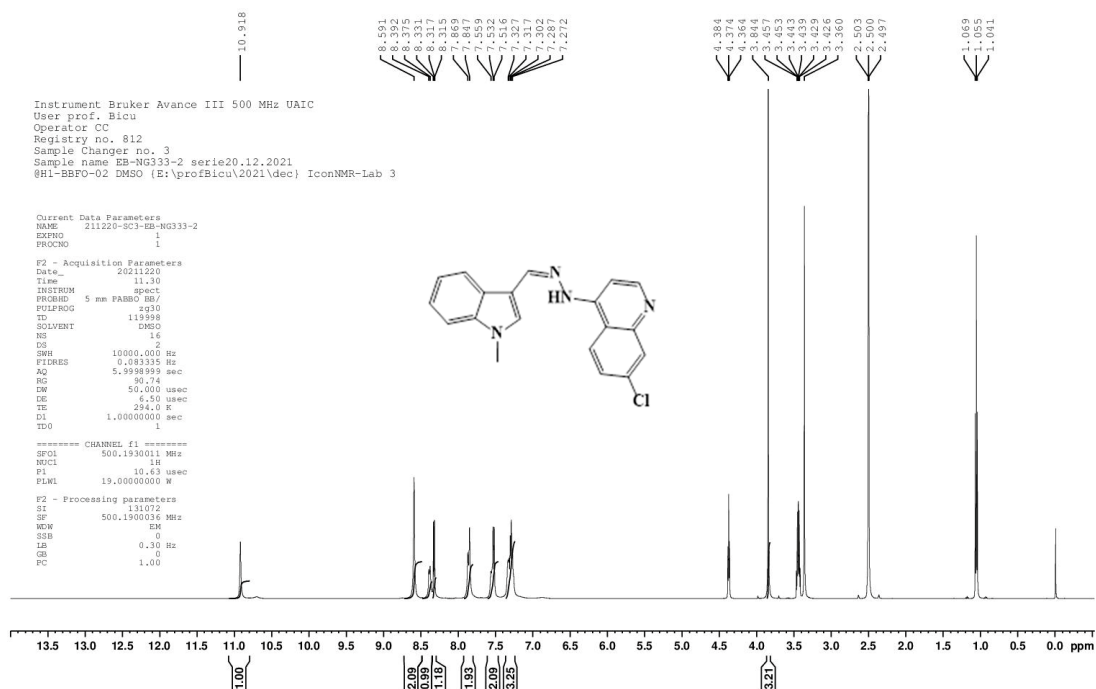

(a)

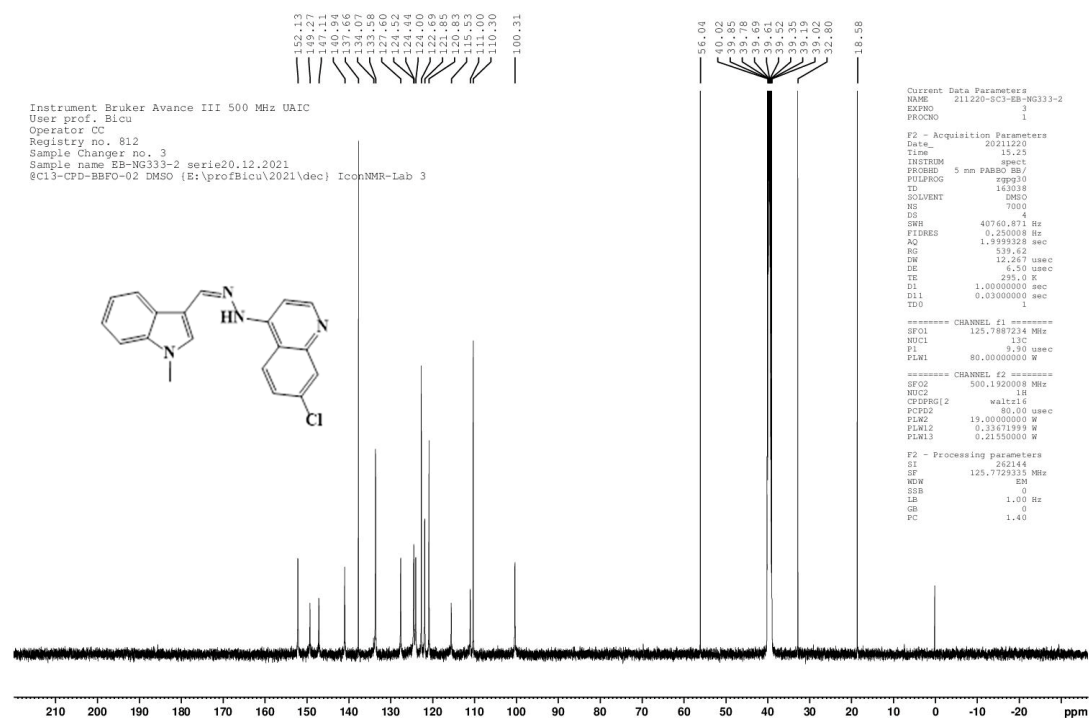

(b)

Figure S20. (a) <sup>1</sup>H-NMR and (b) <sup>13</sup>C-NMR spectra for hydrazone 20

3-((2-(5-bromopyridin-2-yl)hydrazono)methyl)-1-methyl-1*H*-indole (**21**).

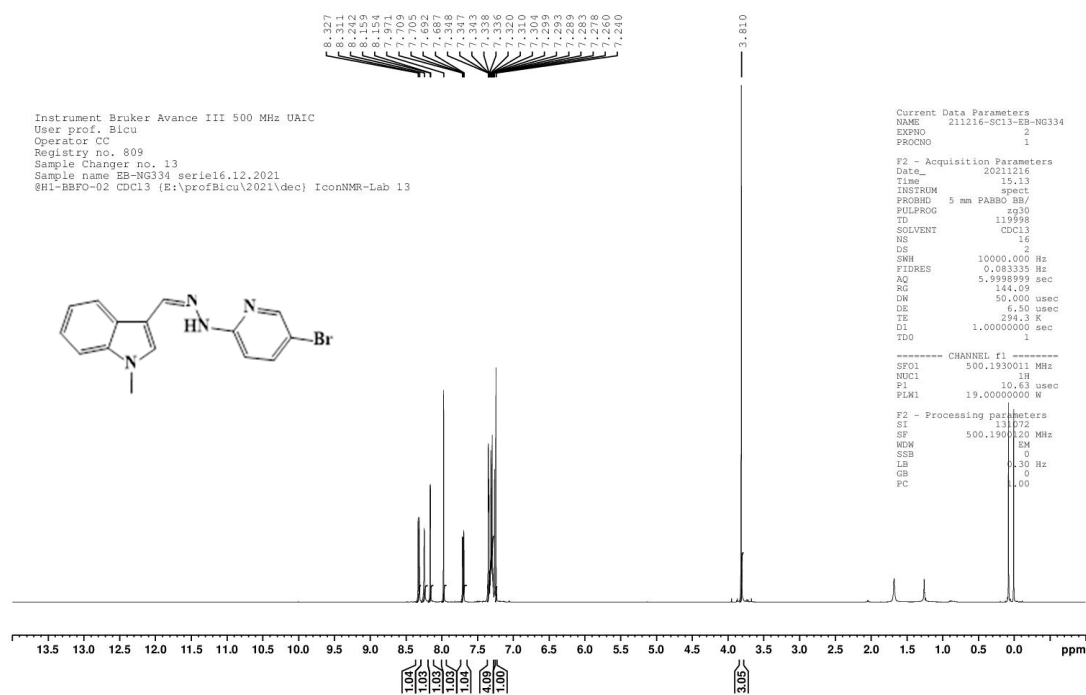

(a)

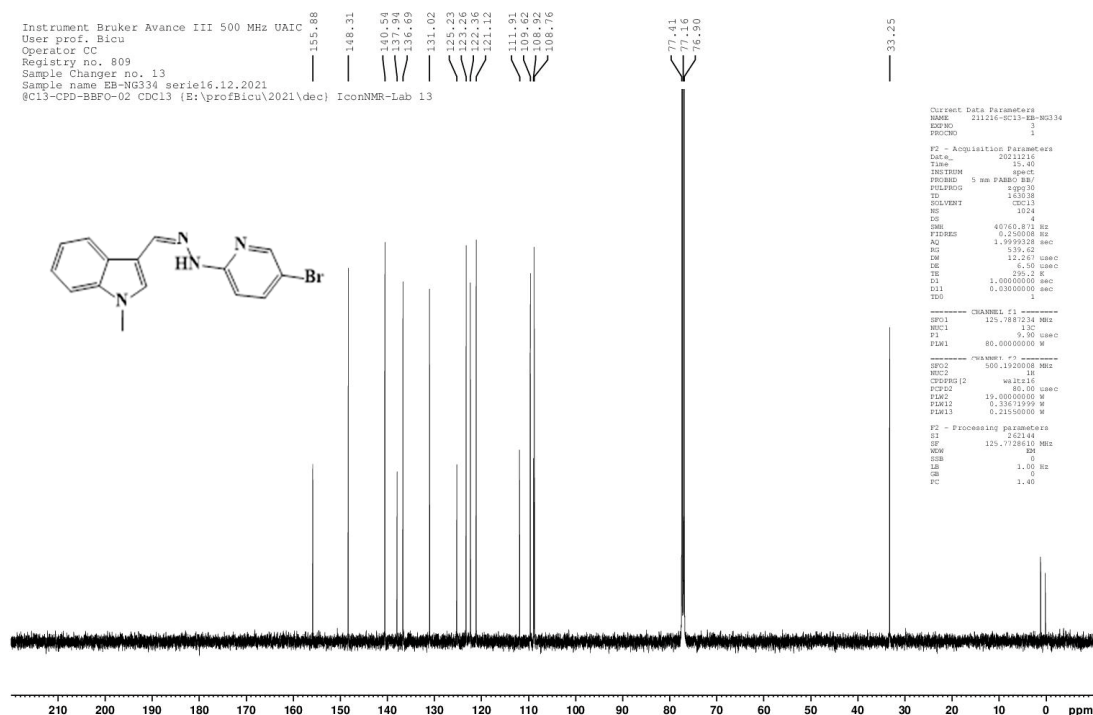

(b)

Figure S21. (a) <sup>1</sup>H-NMR and (b) <sup>13</sup>C-NMR spectra for hydrazone **21**

3-((2-(6-chloropyridin-2-yl)hydrazono)methyl)-1-methyl-1*H*-indole (22).

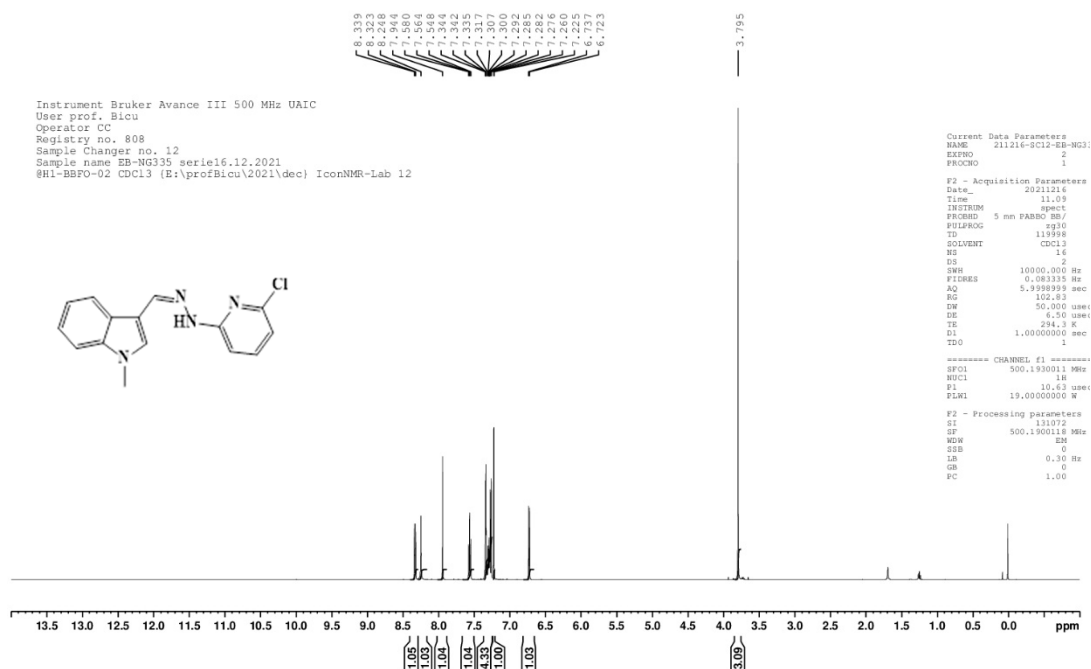

(a)

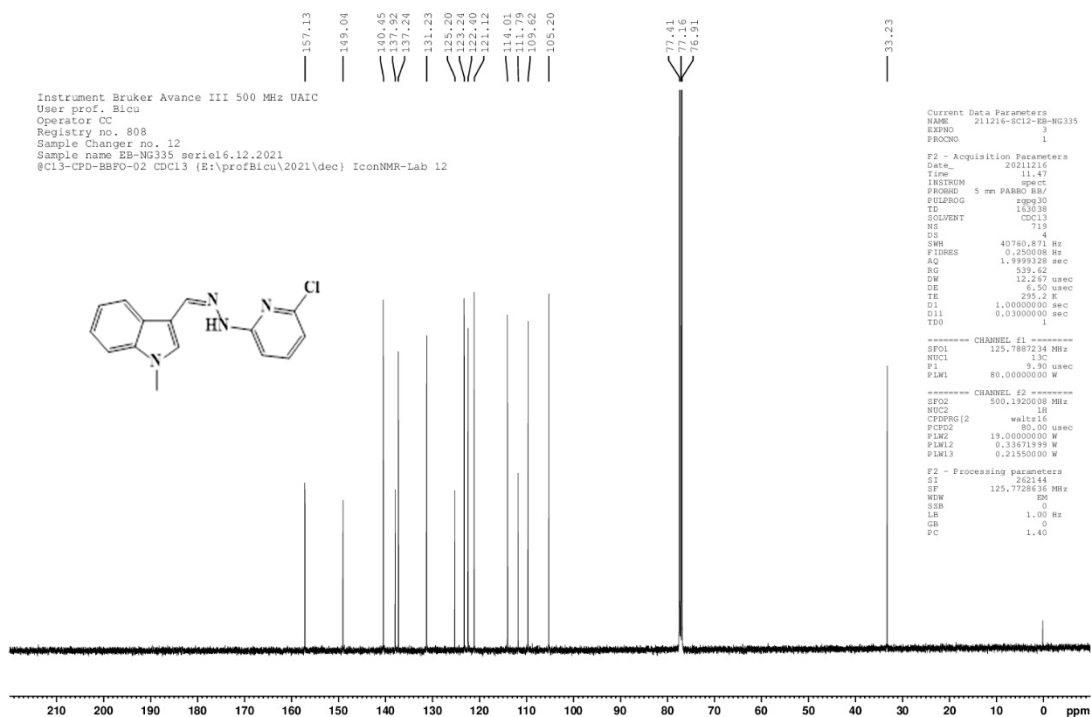

(b)

Figure S22. (a)  $^1\text{H}$ -NMR and (b)  $^{13}\text{C}$ -NMR spectra for hydrazone **22**

7-chloro-4-(2-((5-methoxy-1-methyl-1*H*-indol-3-yl)methylene)hydrazinyl)quinoline (**23**).

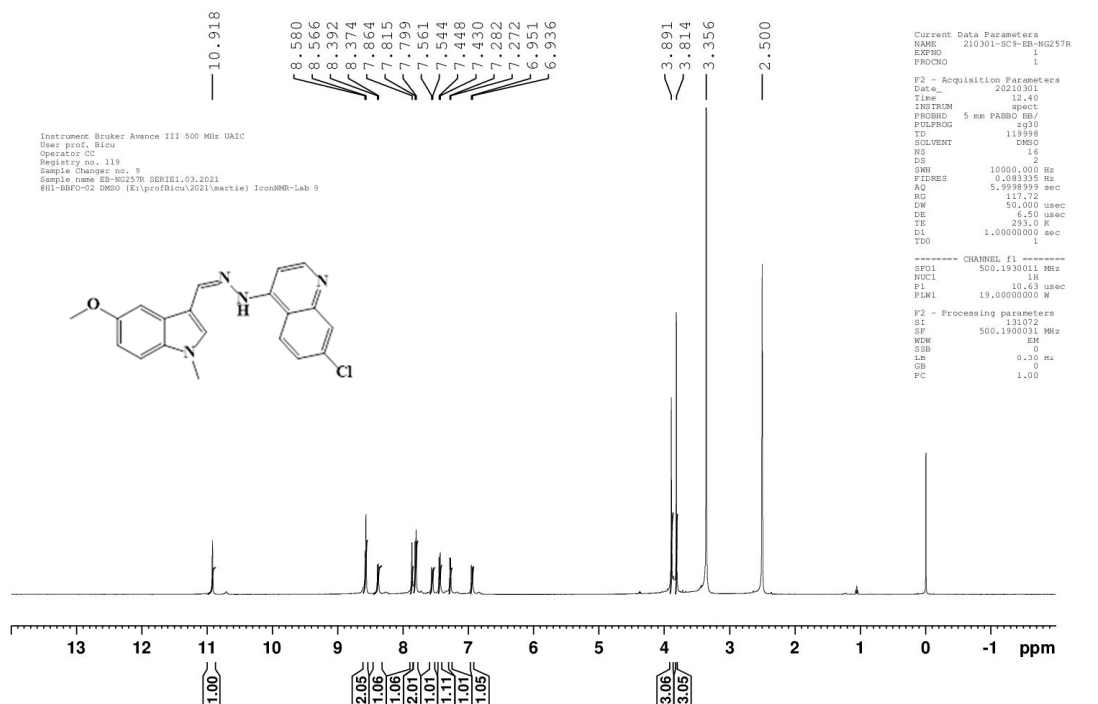

(a)

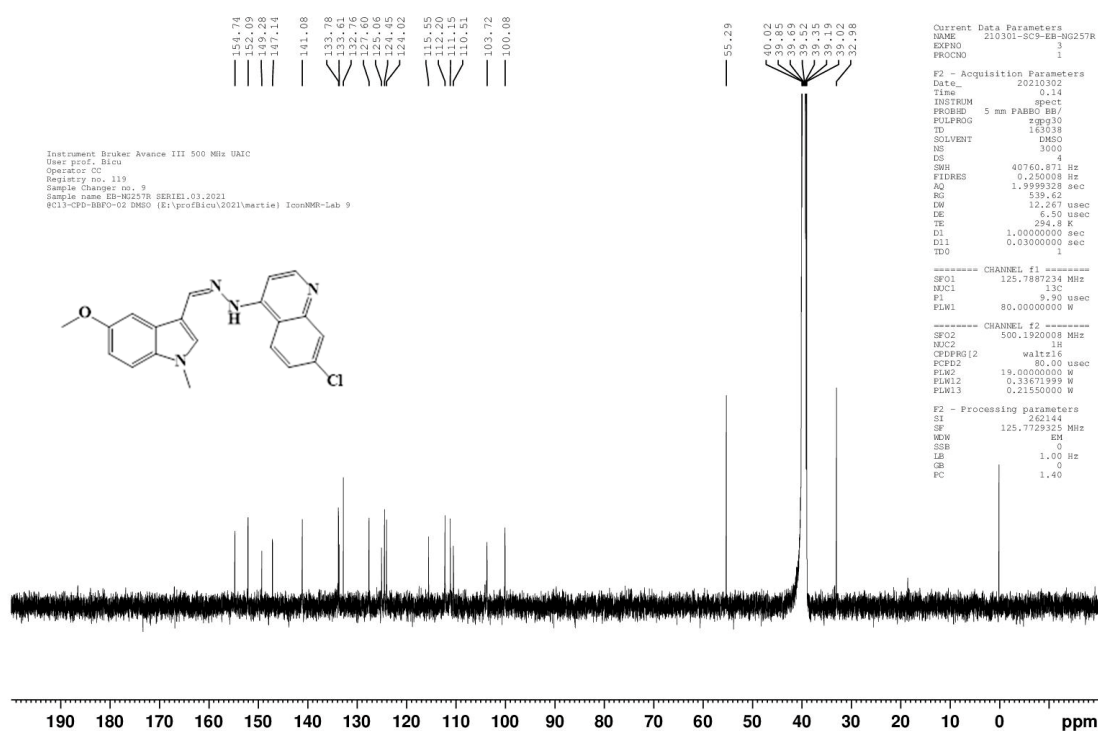

(b)

Figure S23. (a) <sup>1</sup>H-NMR and (b) <sup>13</sup>C-NMR spectra for hydrazone **23**



2-(2-((5-methoxy-1-methyl-1*H*-indol-3-yl)methylene)hydrazinyl)quinoline (24).

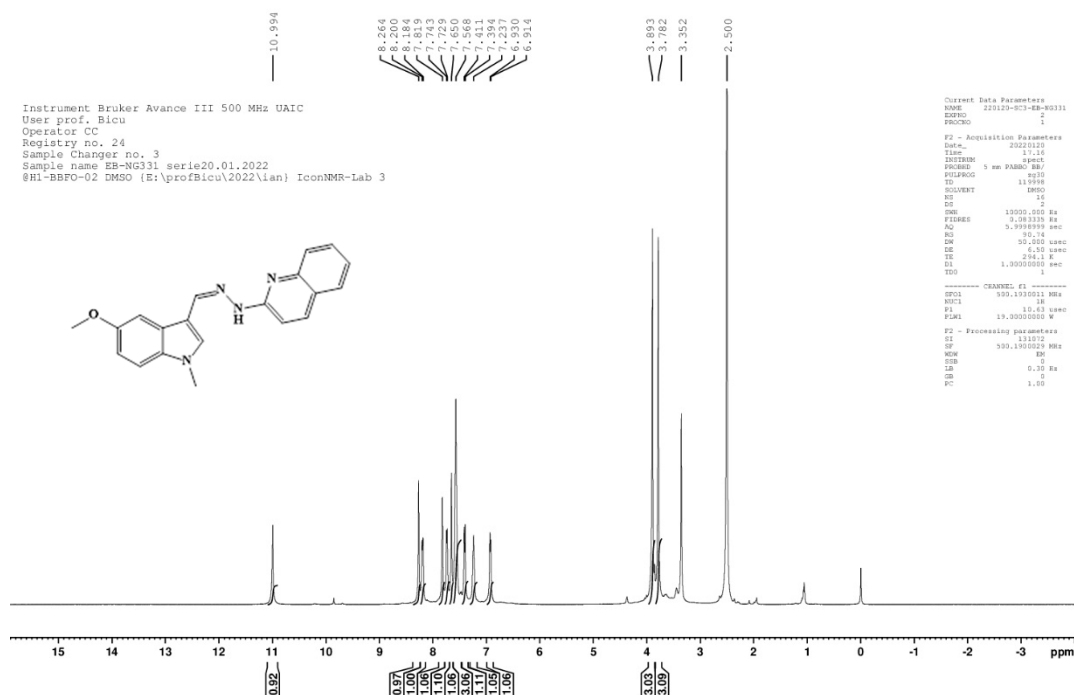

(a)

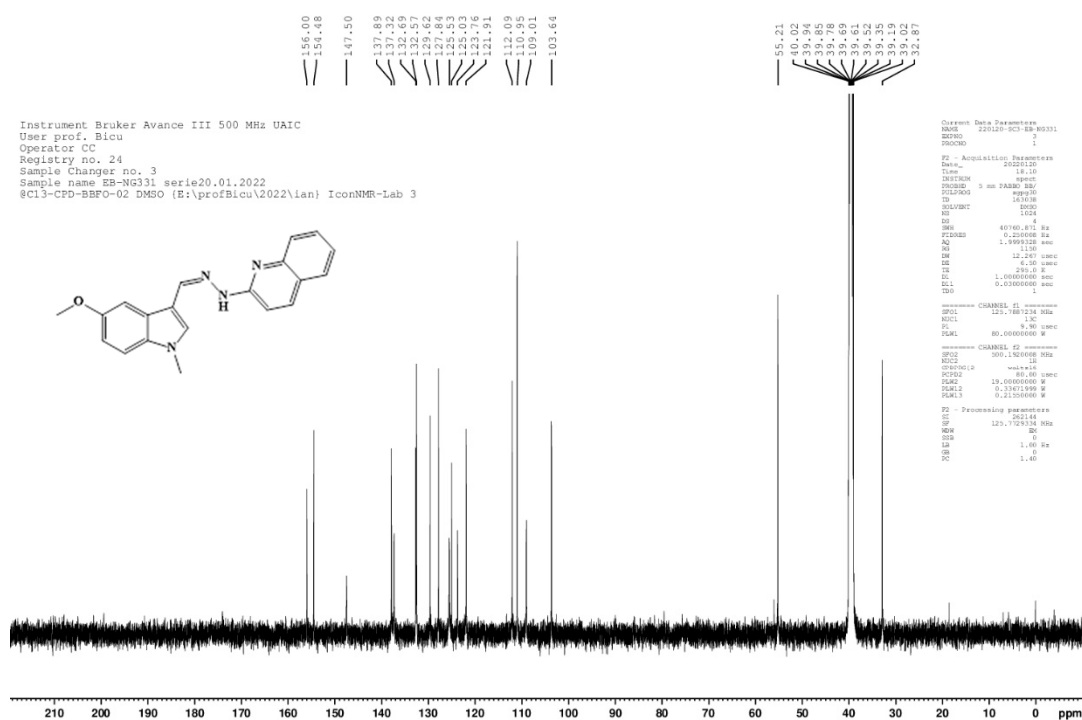

(b)

Figure S24. (a) <sup>1</sup>H-NMR and (b) <sup>13</sup>C-NMR spectra for hydrazone 24

4-(2-((5-bromo-1*H*-indol-3-yl)methylene)hydrazinyl)-7-chloroquinoline (**25**).

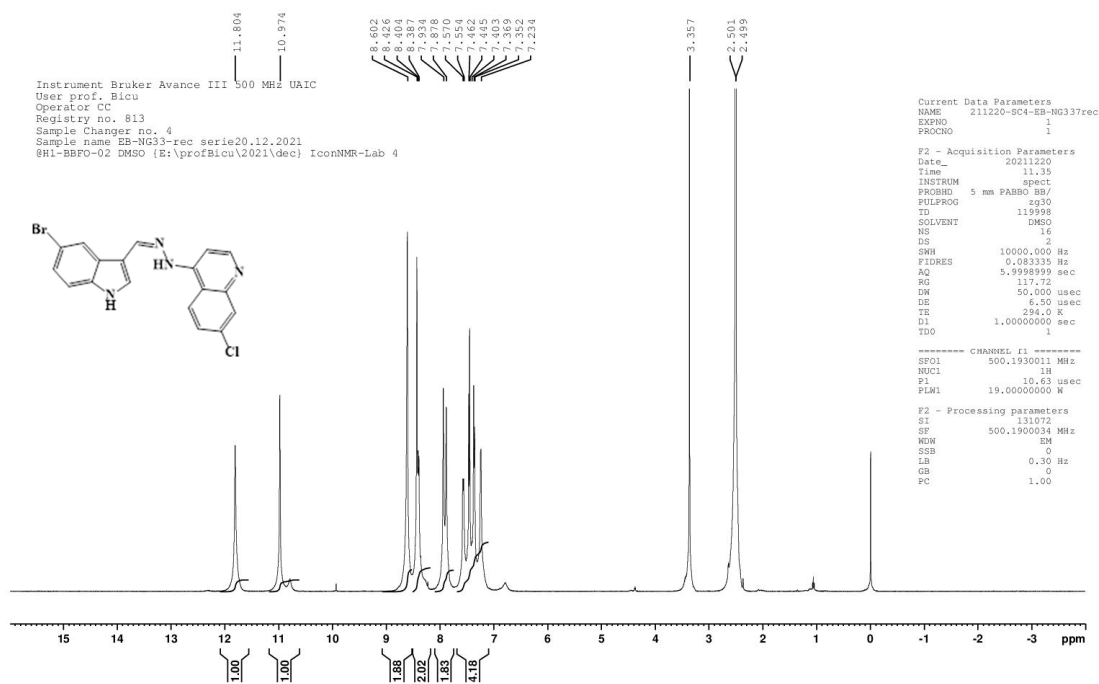

(a)

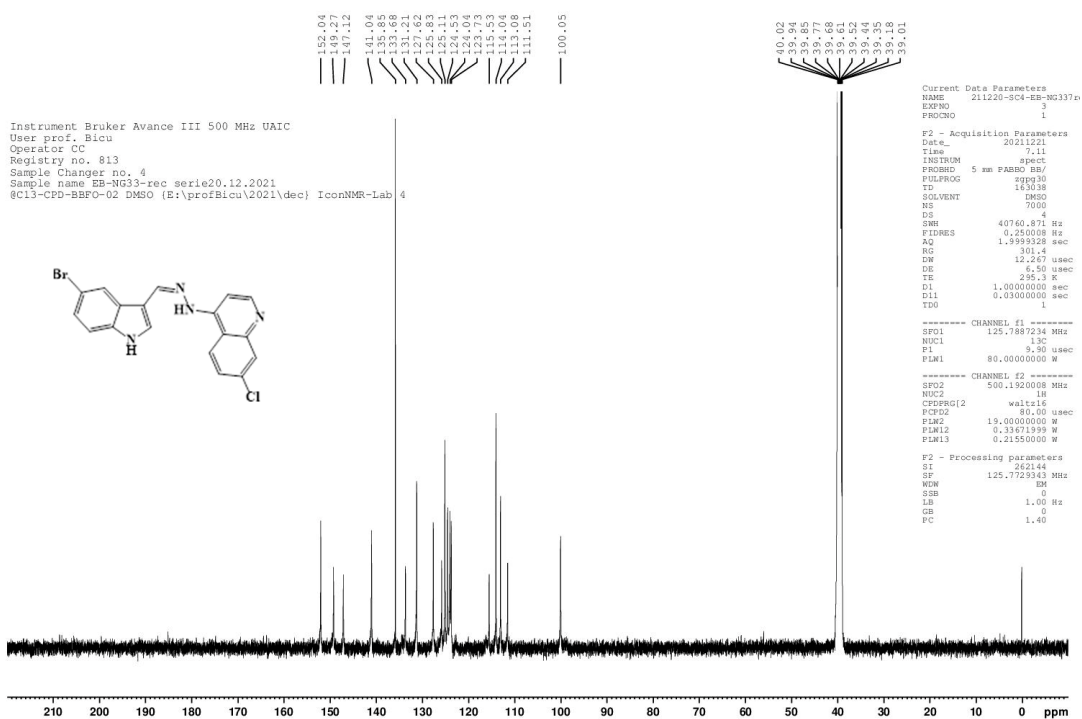

(b)

Figure S25. (a)  $^1\text{H}$ -NMR and (b)  $^{13}\text{C}$ -NMR spectra for hydrazone **25**

5-bromo-3-((2-(5-bromopyridin-2-yl)hydrazono)methyl)-1*H*-indole (**26**).

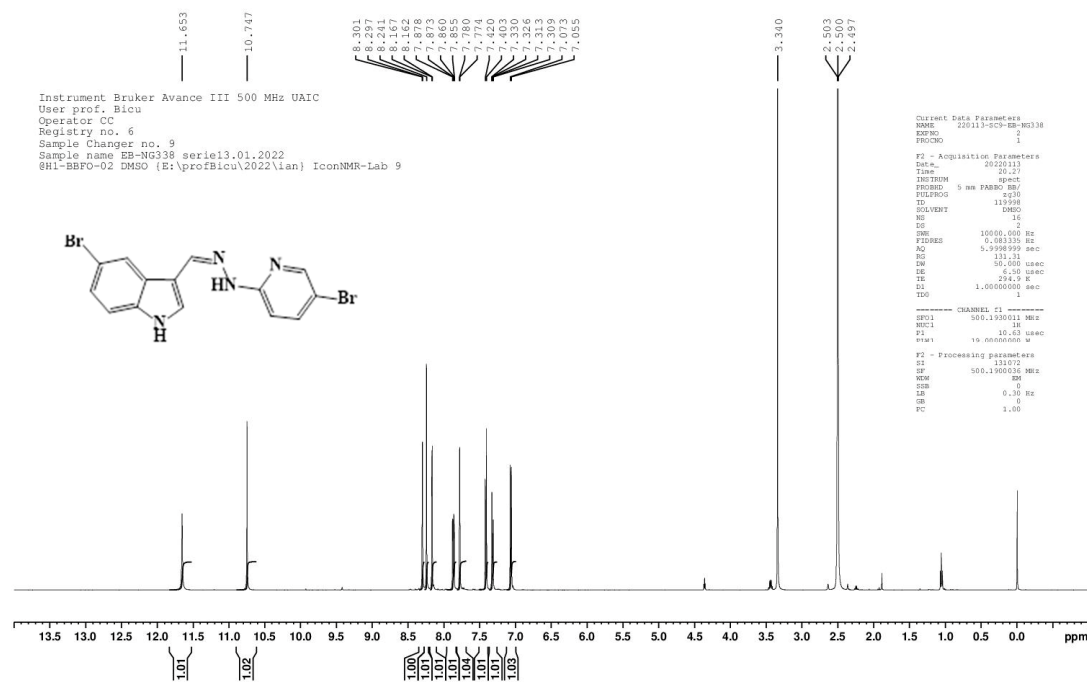

(a)

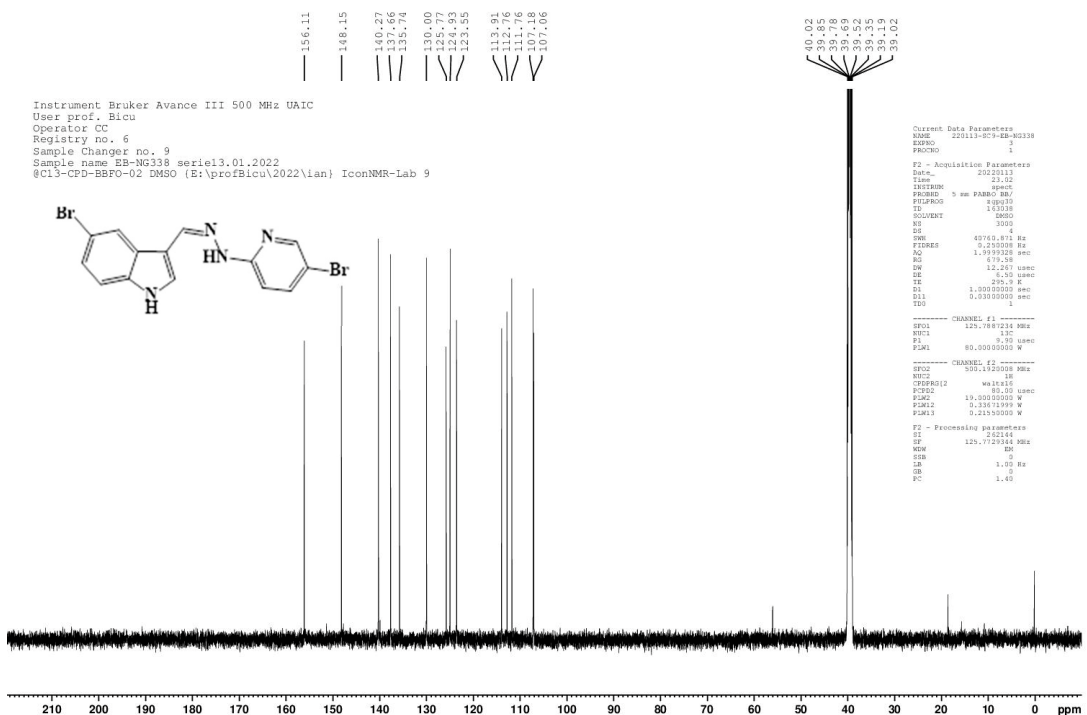

(b)

Figure S26. (a) <sup>1</sup>H-NMR and (b) <sup>13</sup>C-NMR spectra for hydrazone **26**

5-bromo-3-((2-(6-chloropyridin-2-yl)hydrazono)methyl)-1*H*-indole (**27**).

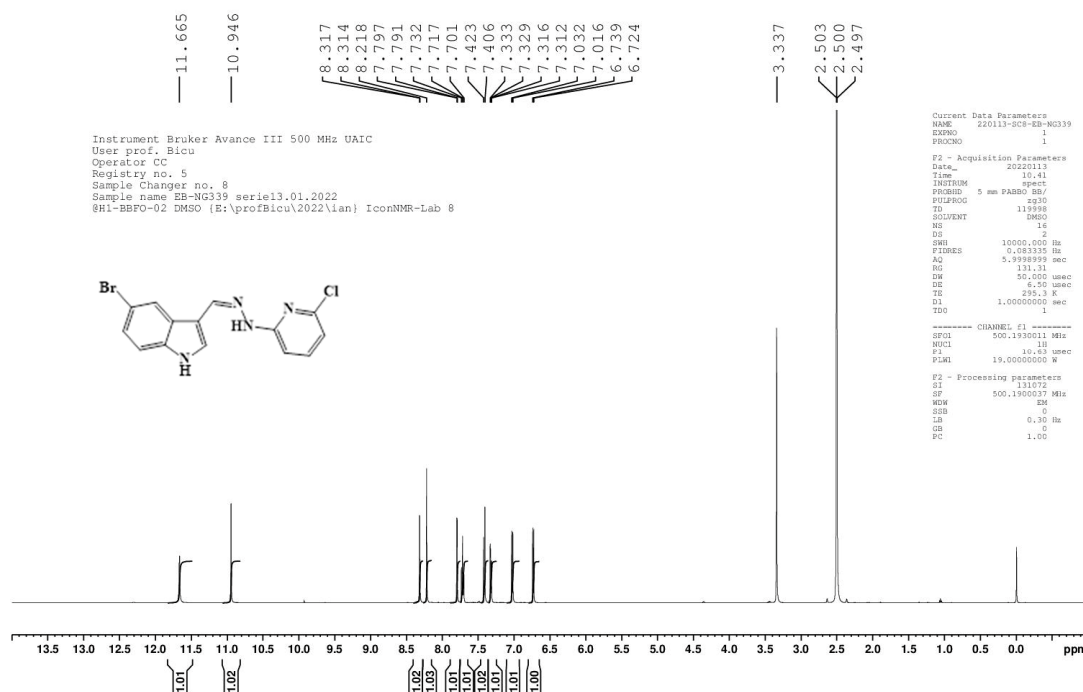

(a)

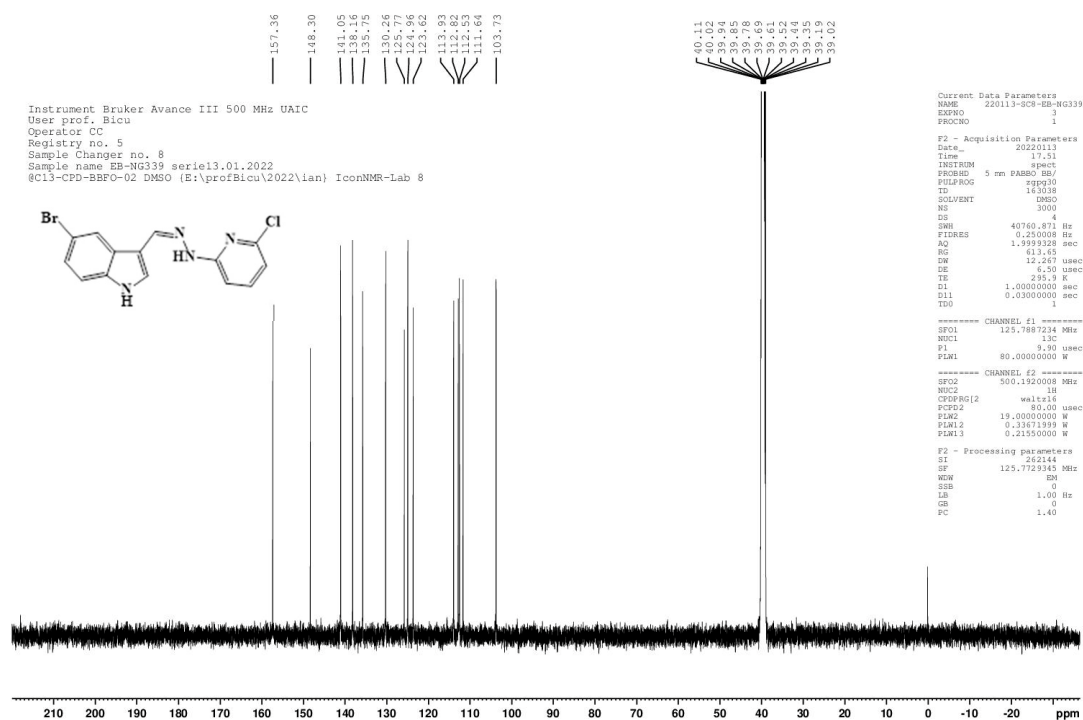

(b)

Figure S27. (a) <sup>1</sup>H-NMR and (b) <sup>13</sup>C-NMR spectra for hydrazone **27**
